# Supplementary material for: Small Molecule Ice Recrystallization Inhibitors Enable Freezing of Human Red Blood Cells with Reduced Glycerol Concentrations
Source: PubMed Central journal article supplement (PMC4389209; doi:10.1038/srep09692), 2015-04-08
Supplement: srep09692-s1.pdf [file srep09692-s1.pdf]

## *Supplementary Information*

### **Small Molecule Ice Recrystallization Inhibitors Enable Freezing of Human Red Blood Cells with Reduced Glycerol Concentrations**

Chantelle J. Capicciotti<sup>1</sup>, Jayme D. R. Kurach<sup>2</sup>, Tracey R. Turner<sup>2</sup>, Ross S. Mancini<sup>1</sup>,  
Jason P. Acker<sup>2</sup> and Robert N. Ben<sup>1,\*</sup>

<sup>1</sup>*Department of Chemistry, D'Iorio Hall, 10 Marie Curie, University of Ottawa, Ottawa, ON, Canada, K1N 6N5  
Fax: 1-613-562-5170 Tel: 1-613-562-5800; E-mail: rben@uottawa.ca.*

<sup>2</sup>*Canadian Blood Services, Centre for Innovation, 8249 – 114 Street NW, Edmonton, AB, Canada, T6G 2R8 Tel: 1-780-702-8269; E-mail: jason.acker@blood.ca.*

#### **Table of Contents**

|                                                                                                                                              |           |
|----------------------------------------------------------------------------------------------------------------------------------------------|-----------|
| <b>Supplemental RBC Freezing Data .....</b>                                                                                                  | <b>2</b>  |
| <b>Supplementary Methods .....</b>                                                                                                           | <b>3</b>  |
| <b>General Experimental: .....</b>                                                                                                           | <b>3</b>  |
| <b>Synthesis of p-methoxyphenyl-<math>\beta</math>-D-galactopyranoside (5) and p-methoxyphenyl-<math>\beta</math>-D-glucopyranoside (6):</b> | <b>4</b>  |
| <b>Synthesis of p-methoxyphenyl-<math>\beta</math>-D-mannopyranoside (7): .....</b>                                                          | <b>5</b>  |
| <b>Synthesis of phenolic-glucopyranosides 8-13: .....</b>                                                                                    | <b>8</b>  |
| <b>Synthesis of p-methoxybenzyl-glucopyranoside 15: .....</b>                                                                                | <b>13</b> |
| <b>Synthesis of <math>\alpha</math>-linked p-methoxyphenyl-glucopyranoside 16: .....</b>                                                     | <b>14</b> |
| <b>References .....</b>                                                                                                                      | <b>15</b> |
| <b>Spectra .....</b>                                                                                                                         | <b>16</b> |

## Supplemental RBC Freezing Data

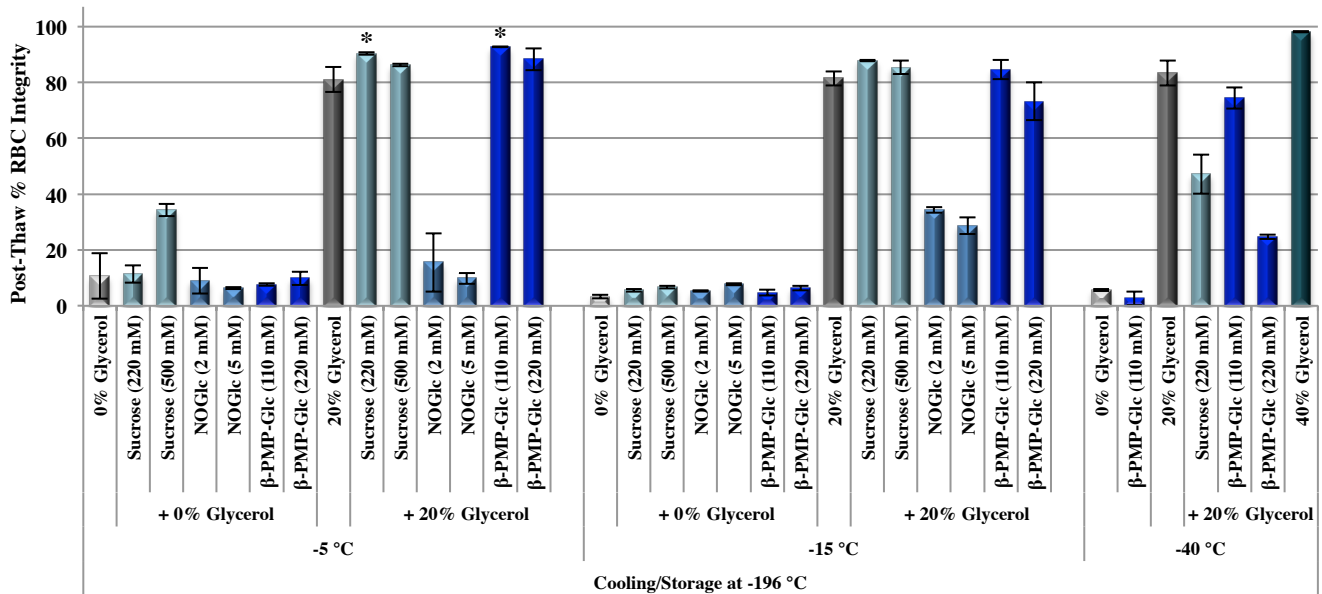

**Figure S1 | RBC freezing with novel small molecule IRIs.** The effect of NOGlc (4), β-PMP-Glc (6) and sucrose on post-thaw RBC integrities. RBC samples in indicated cryo-solutions containing no (0%) or 20% glycerol in a dextrose/saline buffer were slow-cooled 1 °C/min to defined sub-zero temperatures and then rapidly cooled (cooling rate approximately 115 °C/min) by immersion into liquid nitrogen and stored at -196 °C. All samples were quickly thawed at 37 °C and post-thaw hemolysis was quantified post-thaw using Drabkin's assay to determine % RBC integrity (100 - % hemolysis). Error bars represent SEM. Asterisks indicate statistical significance relative to the glycerol control as determined by two-tailed unpaired student's T-test: \*,  $p < 0.05$ ; \*\*,  $p < 0.01$ ; \*\*\*,  $p < 0.001$ .

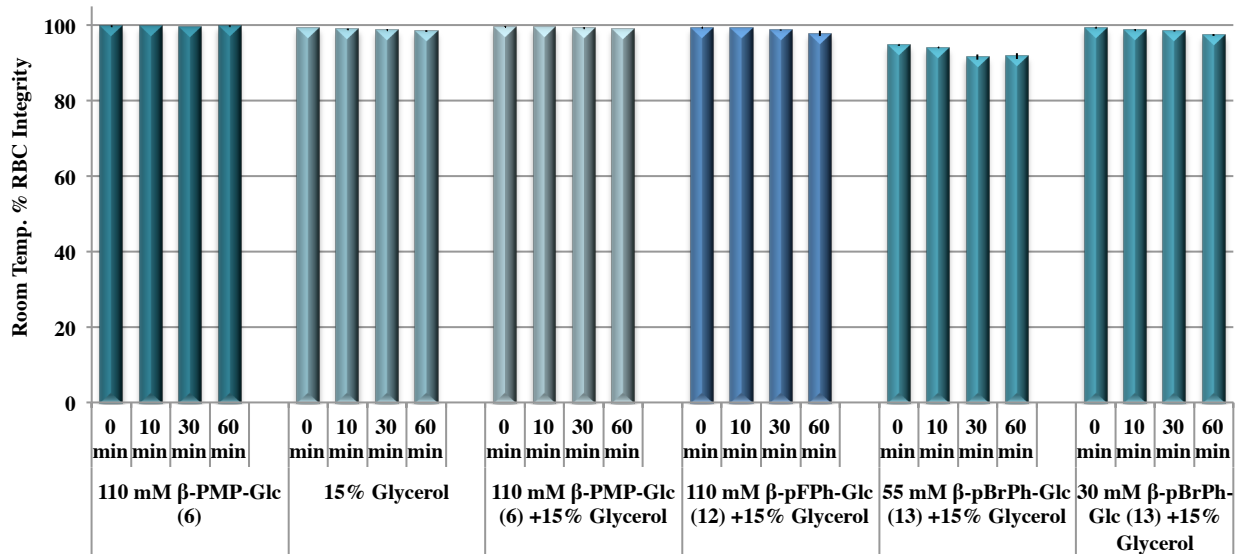

**Figure S2 | Toxicity of β-PMP-Glc (6), β-pFPh-Glc (12) and β-pBrPh-Glc (13) cryo-solutions on RBCs.** RBC integrities after room temperature incubation for indicated time period with cryo-solutions without freezing. Hemolysis was quantified post-thaw using Drabkin's assay to determine % RBC integrity (100 - % hemolysis). Error bars represent SEM.

## **Supplementary Methods**

### ***General Experimental:***

All anhydrous reactions were performed in flame-dried glassware under a positive pressure of dry argon. Air or moisture-sensitive reagents and anhydrous solvents were transferred with oven-dried syringes or cannulae. All flash chromatography was performed with E. Merck silica gel 60 (230-400 mesh). All solution phase reactions were monitored using analytical thin layer chromatography (TLC) with 0.2 mm pre-coated silica gel aluminum plates 60 F254 (E. Merck). Components were visualized by illumination with a short-wavelength (254 nm) ultra-violet light and/or staining (ceric ammonium molybdate, potassium permanganate, or phosphomolybdate stain solution). All solvents used for anhydrous reactions were distilled. Tetrahydrofuran (THF) and diethyl ether (Et<sub>2</sub>O) were distilled from sodium/benzophenone under nitrogen. Dichloromethane (DCM) was distilled from calcium hydride. *N,N*-dimethylformamide (DMF) was stored over activated 4Å molecular sieves under argon. <sup>1</sup>H (400 or 500 MHz) and <sup>13</sup>C NMR (100 or 125 MHz) spectra were recorded at ambient temperature on a Bruker Avance 400, Bruker Avance 500, or Varian Inova 500 spectrometer. Deuterated chloroform (CDCl<sub>3</sub>) or water (D<sub>2</sub>O) were used as NMR solvents, unless otherwise stated. Chemical shifts are reported in ppm using the solvent residual peak as an internal standard. Splitting patterns are designated as follows: s, singlet; d, doublet; t, triplet; q, quartet; quint, quintet; m, multiplet and br, broad. Low resolution mass spectrometry (LRMS) was performed on a Micromass Quatro-LC Electrospray spectrometer with a pump rate of 20 μL/min using electrospray ionization (ESI).

Compounds below are in order of appearance in the manuscript. Intermediates that were not numbered in the manuscript received numbers beginning with **12**. NMR spectra for novel compounds and final compounds assessed for IRI activity are provided.

**Synthesis of *p*-methoxyphenyl- $\beta$ -D-galactopyranoside (5) and *p*-methoxyphenyl- $\beta$ -D-glucopyranoside (6):**

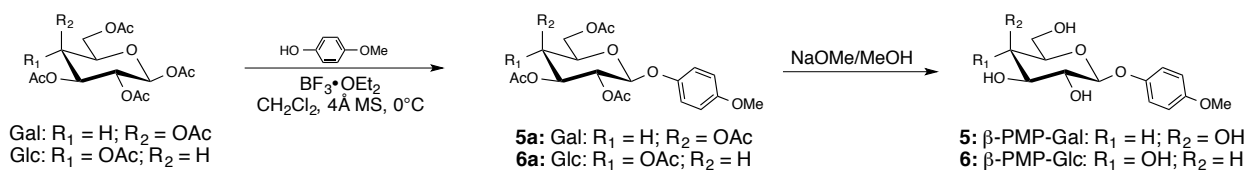

**Figure S3.** Synthesis of  $\beta$ -PMP-Gal (**5**) and  $\beta$ -PMP-Glc (**6**)

***p*-Methoxyphenyl-2,3,4,6-tetra-*O*-acetyl- $\beta$ -D-galactopyranoside (**5a**)**

To a mixture of 1,2,3,4,6-penta-*O*-acetyl- $\beta$ -D-galactopyranose (5.0 g, 12.8 mmol), 4-methoxyphenol (2.22 g, 17.9 mmol) and 4 Å MS in anhydrous CH<sub>2</sub>Cl<sub>2</sub> (50 mL) stirring at 0 °C under Ar, was slowly added boron trifluoride diethyl etherate (2.09 mL, 16.6 mmol). The reaction mixture was stirred overnight, then diluted with CH<sub>2</sub>Cl<sub>2</sub> and quenched with sodium bicarbonate. The solution was filtered through Celite®, then extracted with CH<sub>2</sub>Cl<sub>2</sub>. The organic layer was washed with sodium bicarbonate, water, saturated brine, then dried over MgSO<sub>4</sub> and concentrated. Column chromatography (3:1 hexanes/ethyl acetate) afforded **5a** as a white powder (5.3 g, 91%). Characterization data is consistent with that previously reported<sup>1</sup>. <sup>1</sup>H NMR (500 MHz, CDCl<sub>3</sub>):  $\delta$  6.97-6.94 (m, 2H), 6.84-6.80 (m, 2H), 5.47-5.44 (m, 2H), 5.09 (dd, *J* = 10.4, 3.4 Hz, 1H), 4.92 (d, *J* = 8.0 Hz, 1H), 4.23 (dd, *J* = 11.3, 6.8 Hz, 1H), 4.16 (dd, *J* = 11.3, 6.5 Hz, 1H), 4.02-3.99 (m, 1H), 3.78 (s, 3H), 2.18 (s, 3H), 2.09 (s, 3H), 2.06 (s, 3H), 2.01 (s, 3H). <sup>13</sup>C NMR (100 MHz, CDCl<sub>3</sub>):  $\delta$  170.3, 170.0, 169.4, 169.3, 155.8, 150.9, 118.7, 114.5, 100.7, 72.4, 71.3, 70.2, 66.3, 61.4, 55.5, 20.7, 20.6, 20.6, 20.5. LRMS (ESI): *m/z* calcd. for C<sub>21</sub>H<sub>30</sub>NO<sub>11</sub> [M+NH<sub>4</sub>]<sup>+</sup> 472.5; found, 472.3.

***p*-Methoxyphenyl- $\beta$ -D-galactopyranoside (**5**)**

Compound **5a** (5.3 g, 11.6 mmol) was dissolved in a solution of sodium methoxide in methanol (25 mL) and stirred for one hour at room temperature. The solution was then neutralized with Amberlite® IR-120 (H<sup>+</sup>) ion-exchange resin and filtered. The filtrate was concentrated and the product was lyophilized to yield **5** as a white powder (3.3 g, 98%). Characterization data is consistent with that previously reported<sup>1</sup>. <sup>1</sup>H NMR (400 MHz, CD<sub>3</sub>OD):  $\delta$  7.08-7.04 (m, 2H), 6.85-6.81 (m, 2H), 4.72 (d, *J* = 7.7 Hz, 1H), 3.89 (dd, *J* = 3.4, 0.8 Hz, 1H), 3.78-3.74 (m, 3H), 3.74 (s, 3H), 3.63 (ddd, *J* = 6.7, 5.5, 1.1 Hz, 1H), 3.55 (dd, *J* = 9.7, 3.4 Hz, 1H). <sup>13</sup>C NMR (101 MHz, D<sub>2</sub>O):  $\delta$  154.6, 151.0, 118.1, 115.0, 101.7, 75.4, 72.6, 70.6, 68.5, 60.7, 55.8. LRMS (ESI): *m/z* calcd. for C<sub>13</sub>H<sub>18</sub>NaO<sub>7</sub> [M+Na]<sup>+</sup> 309.3; found, 309.3.

***p*-Methoxyphenyl-2,3,4,6-tetra-*O*-acetyl- $\beta$ -D-glucopyranoside (**6a**)**

To a mixture of 1,2,3,4,6-penta-*O*-acetyl- $\beta$ -D-glucopyranose (15 g, 38.4 mmol), 4-methoxyphenol (6.7 g, 53.8 mmol) and 4 Å MS in anhydrous CH<sub>2</sub>Cl<sub>2</sub> (100 mL) stirring at 0 °C under Ar, was slowly added boron trifluoride diethyl etherate (9.64 mL, 76.8 mmol). The reaction mixture was stirred overnight, then diluted with CH<sub>2</sub>Cl<sub>2</sub> and

quenched with sodium bicarbonate. The solution was filtered through Celite®, then extracted with CH<sub>2</sub>Cl<sub>2</sub>. The organic layer was washed with sodium bicarbonate, water, saturated brine, then dried over MgSO<sub>4</sub> and concentrated. Column chromatography (6:4 hexanes/ethyl acetate) afforded **6a** as a white powder (13.6 g, 78%). Characterization data is consistent with that previously reported<sup>2</sup>. <sup>1</sup>H NMR (300 MHz, CDCl<sub>3</sub>): δ 6.97-6.92 (m, 2H), 6.84-6.78 (m, 2H), 5.31-5.20 (m, 2H), 5.16 (t, *J* = 9.6 Hz, 1H), 4.95 (d, *J* = 7.6 Hz, 1H), 4.29 (dd, *J* = 12.3, 5.2 Hz, 1H), 4.18 (dd, *J* = 12.3, 2.5 Hz, 1H), 3.83-3.79 (m, 1H), 3.77 (s, 3H), 2.08 (s, 3H), 2.07 (s, 3H), 2.04 (s, 3H), 2.03 (s, 3H). <sup>13</sup>C NMR (75 MHz, CDCl<sub>3</sub>): δ 170.6, 170.3, 169.4, 169.3, 155.8, 150.9, 118.7, 114.5, 100.3, 72.7, 71.9, 71.2, 68.3, 61.9, 55.6, 20.7, 20.7, 20.6, 20.6. LRMS (ESI): *m/z* calcd. for C<sub>21</sub>H<sub>30</sub>NO<sub>11</sub> [M+NH<sub>4</sub>]<sup>+</sup> 472.5; found, 472.2; *m/z* calcd. for C<sub>21</sub>H<sub>26</sub>NaO<sub>11</sub> [M+Na]<sup>+</sup> 477.4; found, 477.1.

### *p*-Methoxyphenyl-β-D-glucopyranoside (**6**)

Compound **6a** (6.75 g, 14.9 mmol) was dissolved in a solution of sodium methoxide in methanol (25 mL) and stirred for one hour at room temperature. The solution was then neutralized with Amberlite® IR-120 (H<sup>+</sup>) ion-exchange resin, filtered and concentrated. The filtrate was concentrated and the product was lyophilized to yield **6** as a white powder (4.1 g, 95%). <sup>1</sup>H NMR (400 MHz, D<sub>2</sub>O): δ 7.14-7.10 (m, 2H), 7.01-6.96 (m, 2H), 5.01 (d, *J* = 7.6 Hz, 1H), 3.92 (dd, *J* = 12.4, 2.2 Hz, 1H), 3.81 (s, 3H), 3.75 (dd, *J* = 12.4, 5.7 Hz, 1H), 3.62-3.54 (m, 3H), 3.48 (dd, *J* = 9.6, 9.2 Hz, 1H). <sup>13</sup>C NMR (101 MHz, D<sub>2</sub>O): δ 154.7, 150.9, 118.2, 115.0, 101.2, 76.1, 75.5, 72.9, 69.4, 60.5, 55.8. LRMS (ESI): *m/z* calcd. for C<sub>13</sub>H<sub>18</sub>NaO<sub>7</sub> [M+Na]<sup>+</sup> 309.3; found, 309.3.

### Synthesis of *p*-methoxyphenyl-β-D-mannopyranoside (**7**):

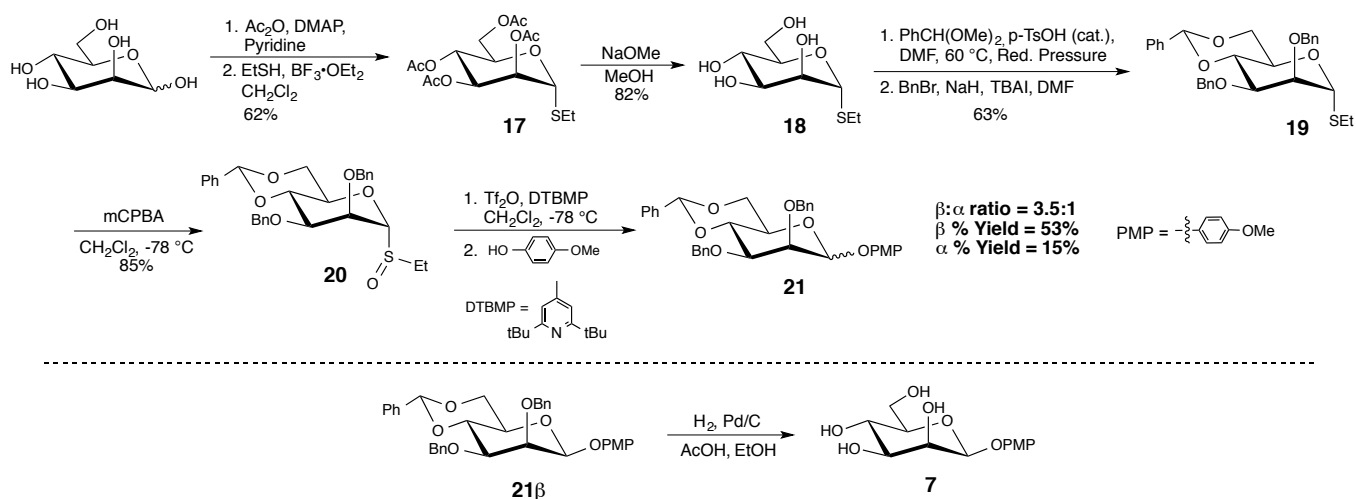

Figure S4. Synthesis of β-PMP-Man (**7**).

### **Ethyl 2,3,4,6-Tetra-*O*-Acetyl-1-thio- $\alpha$ -D-Mannopyranoside (17)**

To a solution of D-mannose (2.0 g, 11.1 mmol) in dry pyridine (45 mL) was added acetic anhydride (26 mL) and the reaction mixture was stirred at 0 °C for 1 hour. A catalytic amount of 4-dimethylaminopyridine was added and the mixture was stirred at room temperature overnight. Ethanol was added and the solvent was evaporated under *in vacuo* and the residue was diluted in ethyl acetate, washed with sodium bicarbonate, water and brine. The mixture was dried with MgSO<sub>4</sub>, filtered and concentrated. The crude product was then added to a solution of ethanethiol (1.23 mL, 16.6 mmol) and 4 Å MS in anhydrous CH<sub>2</sub>Cl<sub>2</sub> (30 mL) stirring at 0 °C under Ar and boron trifluoride diethyl etherate (4.2 mL, 33.3 mmol) was added dropwise. The reaction mixture was stirred overnight, then diluted with CH<sub>2</sub>Cl<sub>2</sub> and quenched with sodium bicarbonate. The solution was filtered through Celite®, then extracted with CH<sub>2</sub>Cl<sub>2</sub>. The organic layer was washed with sodium bicarbonate, water, saturated brine, then dried over MgSO<sub>4</sub> and concentrated. Column chromatography (7:3 hexanes/ethyl acetate) afforded **17** as a syrup (2.7 g, 62%). Characterization data is consistent with that previously reported<sup>3</sup>. <sup>1</sup>H NMR (300 MHz, CDCl<sub>3</sub>):  $\delta$  5.34 (dd,  $J$  = 3.2, 1.6 Hz, 1H), 5.31-5.27 (m, 3H), 4.40 (td,  $J$  = 7.1, 2.5 Hz, 1H), 4.32 (dd,  $J$  = 12.1, 5.3 Hz, 1H), 4.10 (dd,  $J$  = 12.1, 2.2 Hz, 1H), 2.71-2.57 (m, 2H), 2.17 (s, 3H), 2.10 (s, 3H), 2.05 (s, 3H), 1.99 (s, 3H), 1.31 (t,  $J$  = 7.4 Hz, 3H). <sup>13</sup>C NMR (75 MHz, CDCl<sub>3</sub>):  $\delta$  170.6, 170.0, 169.8, 169.7, 82.2, 71.1, 69.5, 68.9, 66.3, 62.4, 25.4, 20.9, 20.7, 20.7, 20.60, 14.7. LRMS (ESI):  $m/z$  calcd. for C<sub>16</sub>H<sub>24</sub>NaO<sub>9</sub>S [M+Na]<sup>+</sup> 415.4; found, 415.2.

### **Ethyl 1-thio- $\alpha$ -D-Mannopyranoside (18)**

Compound **17** (2.7 g, 6.9 mmol) was dissolved in a solution of sodium methoxide in methanol (10 mL) and stirred for one hour at room temperature. The solution was neutralized with Amberlite® IR-120 (H<sup>+</sup>) ion-exchange resin, filtered and concentrated to yield **18** as a solid (1.5 g, 95%). Characterization data is consistent with that previously reported<sup>4</sup>. <sup>1</sup>H NMR (300 MHz, CDCl<sub>3</sub>):  $\delta$  5.31 (d,  $J$  = 1.5 Hz, 1H), 4.03 (dd,  $J$  = 3.3, 1.6 Hz, 1H), 4.01-3.96 (m, 1H), 3.87 (dd,  $J$  = 12.3, 2.3 Hz, 1H), 3.79-3.72 (m, 2H), 3.65 (t,  $J$  = 9.7 Hz, 1H), 2.75-2.57 (m, 2H), 1.26 (t,  $J$  = 7.4 Hz, 3H). <sup>13</sup>C NMR (75 MHz, CDCl<sub>3</sub>):  $\delta$  84.2, 73.0, 71.8, 71.0, 67.1, 60.8, 24.7, 14.0. LRMS (ESI):  $m/z$  calcd. for C<sub>8</sub>H<sub>15</sub>O<sub>5</sub>S [M-H]<sup>-</sup> 223.3; found, 223.0.

### **Ethyl 4,6-*O*-Benzylidene-2,3-*O*-Benzyl-1-thio- $\alpha$ -D-Mannopyranoside (19)**

To a solution of **18** (375 mg, 1.67 mmol) in DMF (3 mL) was added benzaldehyde dimethyl acetal (251  $\mu$ L, 1.67 mmol) and catalytic *p*-toluenesulfonic acid. The solution was stirred under reduced pressure at 60 °C for 3 hours then cooled to room temperature and triethylamine (50  $\mu$ L) was added. The mixture was then evaporated and crystallized from CH<sub>2</sub>Cl<sub>2</sub>/pet. ether to afford 360 mg (69%) of the crude product that was used without further purification. The crude product (166 mg, 0.53 mmol) was dissolved in DMF (5 mL) and to this solution was added NaH (85 mg, 2.12 mmol) and the mixture was stirred for 10 min. Benzyl bromide (189  $\mu$ L, 1.59 mmol) was added, followed by a catalytic amount of tetrabutylammonium iodide and the reaction mixture was stirred

overnight. The mixture was quenched the following day with brine and diluted with ethyl acetate. The organic layer was extracted and washed with brine, then dried over MgSO<sub>4</sub> and concentrated. Purification by flash chromatography (19:1 hexanes/ethyl acetate) yielded **19** (221 mg, 91%, 63% overall) as a syrup. Characterization data is consistent with that previously reported in the literature<sup>5</sup>. <sup>1</sup>H NMR (300 MHz, CDCl<sub>3</sub>): δ 7.53-7.50 (m, 2H), 7.39-7.28 (m, 13H), 5.65 (s, 1H), 5.31 (d, *J* = 0.8 Hz, 1H), 4.82-4.71 (m, 3H), 4.63 (d, *J* = 12.2 Hz, 1H), 4.32-4.16 (m, 3H), 3.94-3.87 (m, 3H), 2.68-2.48 (m, 2H), 1.24 (t, *J* = 7.4 Hz, 3H). <sup>13</sup>C NMR (76 MHz, CDCl<sub>3</sub>): δ 138.4, 137.9, 137.6, 128.8, 128.4, 128.3, 128.2, 128.1, 127.8, 127.6, 127.5, 126.1, 101.4, 83.5, 79.2, 78.1, 76.4, 73.1, 73.0, 68.6, 64.6, 25.3, 14.9. LRMS (ESI): *m/z* calcd. for C<sub>29</sub>H<sub>33</sub>O<sub>5</sub>S [M+H]<sup>+</sup> 493.6; found, 493.2.

#### **Ethyl 4,6-*O*-Benzylidene-2,3-*O*-Benzyl-1-thio- $\alpha$ -D-Mannopyranoside S-Oxide (**20**)**

To a stirred solution of **19** (89 mg, 0.181 mmol) in dry dichloromethane (3 mL) at -78 °C was added 70% *meta*-chloroperbenzoic acid (41 mg, 0.181 mmol). The reaction mixture was stirred at -78 °C for 4 hours then warmed to -20 °C and quenched with sodium carbonate. The organic layer was extracted and washed with Na<sub>2</sub>CO<sub>3</sub>, water and brine, then dried over MgSO<sub>4</sub> and concentrated. Purification by column chromatography (2:1 Hex/EtOAc) yielded **20** (78 mg, 85%). Characterization data is consistent with that previously reported in the literature<sup>6</sup>. <sup>1</sup>H NMR (300 MHz, CDCl<sub>3</sub>): δ 7.47-7.25 (m, 15H), 5.61 (s, 1H), 4.85-4.77 (m, 2H), 4.71-4.64 (m, 2H), 4.59 (d, *J* = 1.4 Hz, 1H), 4.49 (dd, *J* = 3.4, 1.4 Hz, 1H), 4.32 (dd, *J* = 10.0, 9.0 Hz, 1H), 4.18 (dd, *J* = 9.8, 4.2 Hz, 1H), 4.10 (dd, *J* = 10.1, 3.4 Hz, 1H), 3.81-3.67 (m, 2H), 2.93-2.83 (m, 1H), 2.68-2.56 (m, 1H), 1.33 (t, *J* = 7.5 Hz, 3H). <sup>13</sup>C NMR (76 MHz, CDCl<sub>3</sub>): δ 138.7, 137.4, 137.2, 128.6, 128.3, 128.3, 128.0, 127.9, 127.8, 127.6, 127.5, 125.6, 101.9, 92.2, 78.2, 77.1, 76.4, 73.1, 73.0, 68.3, 64.6, 45.4, 6.9. LRMS (ESI): *m/z* calcd. for C<sub>29</sub>H<sub>32</sub>KO<sub>6</sub>S [M+K]<sup>+</sup> 547.7; found, 547.1.

#### ***p*-Methoxyphenyl-4,6-*O*-Benzylidene-2,3-*O*-Benzyl- $\beta$ -D-Mannopyranoside (**21**)**

Glycosidation conditions to form the  $\beta$ -linked mannopyranoside were as described by Crich et al<sup>7,8</sup>. To a stirred solution of sulfoxide **20** (17.6 mg, 0.035 mmol) and 2,6-di-*tert*-butyl-4-methylpyridine (14.2 mg, 0.069 mmol) in dry dichloromethane (1 mL) cooled to -78 °C under argon was added trifluoromethanesulfonic anhydride (6.4  $\mu$ L, 0.038 mmol). After stirring for 2-5 minutes a solution of 4-methoxyphenol (4.7 mg, 0.038 mmol) in dry dichloromethane (1 mL) was added dropwise. The reaction mixture was stirred at -78 °C for 2 hours then warmed to 0 °C over 2 hours and maintained at 0 °C for 30 minutes before quenching with sodium bicarbonate, washing with brine, drying over MgSO<sub>4</sub> and concentrating. Purification by column chromatography over a gradient (19:1 hexanes/ethyl acetate to 8:2 hexanes/ethyl acetate) gave a 3.5:1  $\beta$ : $\alpha$  mixture and yielded pure  $\beta$ -anomer (as determined by <sup>1</sup>H NMR analysis and *J*<sub>1,2</sub> values<sup>9</sup>) (10.1 mg, 53%) and pure  $\alpha$ -anomer (2.9 mg, 15%). Characterization data for **21  $\beta$ -anomer**: <sup>1</sup>H-NMR (500 MHz; CDCl<sub>3</sub>): δ 7.55-7.50 (m, 4H), 7.40-7.28 (m, 11H),

6.95-6.93 (m, 2H), 6.83-6.81 (m, 2H), 5.65 (s, 1H), 5.08 (d,  $J = 12.3$  Hz, 1H), 5.01 (d,  $J = 12.2$  Hz, 1H), 4.96 (d,  $J = 0.6$  Hz, 1H), 4.75 (d,  $J = 12.5$  Hz, 1H), 4.65 (d,  $J = 12.4$  Hz, 1H), 4.34 (dt,  $J = 10.4, 5.2$  Hz, 1H), 4.29 (d,  $J = 9.7$  Hz, 1H), 4.11 (d,  $J = 3.0$  Hz, 1H), 3.98 (t,  $J = 10.3$  Hz, 1H), 3.77 (s, 3H), 3.68 (dd,  $J = 9.9, 3.1$  Hz, 1H), 3.46-3.41 (m, 1H).  $^{13}\text{C}$  NMR (126 MHz;  $\text{CDCl}_3$ ):  $\delta$  155.3, 151.0, 138.2, 138.2, 137.5, 128.9, 128.7, 128.3, 128.2, 128.2, 127.7, 127.6, 127.6, 126.0, 117.9, 114.5, 101.5, 100.8, 78.5, 77.8, 76.0, 75.0, 72.6, 68.6, 67.6, 55.6. LRMS (ESI):  $m/z$  calcd. for  $\text{C}_{34}\text{H}_{34}\text{KO}_7$   $[\text{M}+\text{K}]^+$  593.7; found, 593.3.

### *p*-Methoxyphenyl- $\beta$ -D-Mannopyranoside (7)

A solution of **21b** (8.6 mg, 0.016 mmol) in 4 mL of EtOH/AcOH (3:1) and 5% Pd/C was stirred for 16 hours under an atmosphere of  $\text{H}_2$ . The flask was purged with air, the catalyst was removed by filtration through Celite® and the solvents were removed *in vacuo*. Purification by C-18 solid-phase extraction cartridge over a gradient (water to 9:1 water/ACN to 8:2 water/ACN to 1:1 water/ACN) afforded **7** (3.3 mg, 74%) as a white solid.  $^1\text{H}$  NMR (500 MHz,  $\text{D}_2\text{O}$ ):  $\delta$  7.11 (d,  $J = 9.1$  Hz, 2H), 7.00 (d,  $J = 9.1$  Hz, 2H), 5.28 (s, 1H), 4.20 (d,  $J = 2.9$  Hz, 1H), 3.94 (dd,  $J = 12.3, 2.2$  Hz, 1H), 3.82 (s, 3H), 3.79-3.74 (m, 2H), 3.68 (t,  $J = 9.7$  Hz, 1H), 3.51 (ddd,  $J = 9.3, 6.5, 2.5$  Hz, 1H).  $^{13}\text{C}$  NMR (126 MHz,  $\text{D}_2\text{O}$ ):  $\delta$  154.4, 150.5, 117.7, 114.9, 98.3, 76.2, 72.7, 70.5, 66.5, 60.8, 55.7. LRMS (ESI):  $m/z$  calcd. for  $\text{C}_{13}\text{H}_{17}\text{O}_7$   $[\text{M}-\text{H}]^-$  285.3; found, 285.1.

### Synthesis of phenolic-glucopyranosides 8-13:

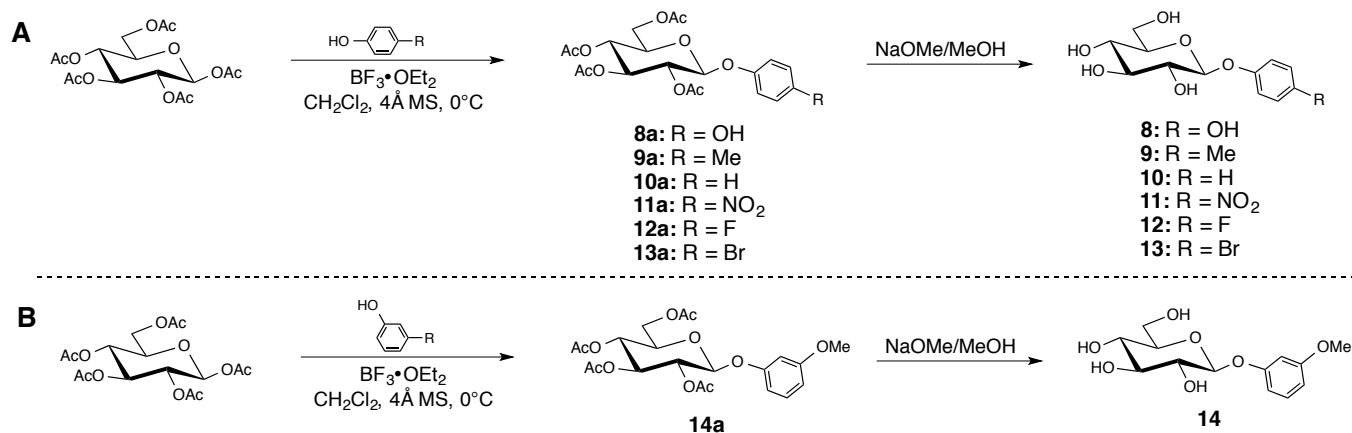

**Figure S5.** Synthesis of phenolic-glucopyranosides (A) **7-13** and (B) **14**.

### *p*-Hydroxyphenyl-2,3,4,6-tetra-*O*-acetyl- $\beta$ -D-glucopyranoside (**8a**)

Compound **8a** was prepared in a similar manner as **6a** from 1,2,3,4,6-penta-*O*-acetyl- $\beta$ -D-glucopyranose (1 g, 2.56 mmol), hydroquinone (211 mg, 1.92 mmol) and boron trifluoride diethyl etherate (482  $\mu\text{L}$ , 3.84 mmol) with 4 Å MS in anhydrous  $\text{CH}_2\text{Cl}_2$  (15 mL) at 0 °C. Column chromatography (7:3 hexanes/ethyl acetate) afforded **8a** (339



mg, 40%) as a white solid. Characterization data is consistent with that previously reported in the literature<sup>10</sup>. <sup>1</sup>H NMR (400 MHz, CDCl<sub>3</sub>): δ 6.90-6.86 (m, 2H), 6.77-6.72 (m, 2H), 5.30-5.20 (m, 2H), 5.16 (t, *J* = 9.5 Hz, 2H), 4.93 (d, *J* = 7.6 Hz, 1H), 4.28 (dd, *J* = 12.3, 5.1 Hz, 1H), 4.16 (dd, *J* = 12.3, 2.5 Hz, 1H), 3.79 (ddd, *J* = 9.9, 5.1, 2.5 Hz, 1H), 2.09 (d, *J* = 1.5 Hz, 3H), 2.07-2.05 (m, 5H), 2.02 (s, 3H). <sup>13</sup>C NMR (101 MHz, CDCl<sub>3</sub>): δ 170.7, 170.3, 169.5, 169.4, 151.8, 150.8, 118.9, 116.0, 100.3, 72.7, 71.9, 71.2, 68.3, 61.9, 20.7, 20.7, 20.6, 20.6. LRMS (ESI): *m/z* calcd. for C<sub>20</sub>H<sub>24</sub>NaO<sub>11</sub> [M+Na]<sup>+</sup> 463.4; found, 463.2.

#### ***p*-Hydroxyphenyl-β-D-glucopyranoside (8)**

Compound **8a** (200 mg, 0.45 mmol) was dissolved in a solution of sodium methoxide in methanol (5 mL) and stirred for one hour at room temperature. The solution was then neutralized with Amberlite® IR-120 (H<sup>+</sup>) ion-exchange resin, filtered and concentrated. The filtrate was concentrated and the product was lyophilized to yield **8** as a white powder (122 mg, 98%). <sup>1</sup>H NMR (400 MHz, D<sub>2</sub>O): δ 7.07-7.03 (m, 2H), 6.89-6.85 (m, 2H), 4.99 (d, *J* = 7.6 Hz, 1H), 3.92 (dd, *J* = 12.4, 2.2 Hz, 1H), 3.75 (dd, *J* = 12.5, 5.6 Hz, 1H), 3.61-3.52 (m, 3H), 3.48 (dd, *J* = 9.7, 8.9 Hz, 1H). <sup>13</sup>C NMR (101 MHz, D<sub>2</sub>O): δ 151.2, 150.4, 118.4, 116.2, 101.3, 76.0, 75.5, 73.0, 69.4, 60.5. LRMS (ESI): *m/z* calcd. for C<sub>12</sub>H<sub>16</sub>NaO<sub>7</sub> [M+Na]<sup>+</sup> 295.3; found, 295.2.

#### ***p*-Methylphenyl-2,3,4,6-tetra-*O*-acetyl-β-D-glucopyranoside (9a)**

Compound **9a** was prepared in a similar manner as **6a** from 1,2,3,4,6-penta-*O*-acetyl-β-D-glucopyranose (500 mg, 1.28 mmol), 4-methylphenol (190 mg, 1.79 mmol) and boron trifluoride diethyl etherate (800 μL, 6.40 mmol) with 4 Å MS in anhydrous CH<sub>2</sub>Cl<sub>2</sub> (6 mL) at 0 °C. Column chromatography (7:3 hexanes/EtOAc) afforded **9a** as a white powder (205 mg, 37%). Characterization data is consistent with that previously reported in the literature<sup>11</sup>. <sup>1</sup>H NMR (400 MHz, CDCl<sub>3</sub>): δ 7.09 (d, *J* = 8.2 Hz, 2H), 6.89 (d, *J* = 8.6 Hz, 2H), 5.31-5.23 (m, 2H), 5.16 (t, *J* = 9.6 Hz, 1H), 5.02 (d, *J* = 7.7 Hz, 1H), 4.29 (dd, *J* = 12.2, 5.3 Hz, 1H), 4.16 (dd, *J* = 12.3, 2.3 Hz, 1H), 3.85-3.81 (m, 1H), 2.30 (s, 3H), 2.08 (s, 3H), 2.06 (s, 3H), 2.05 (s, 3H), 2.03 (s, 3H). <sup>13</sup>C NMR (101 MHz, CDCl<sub>3</sub>): δ 170.6, 170.3, 169.4, 169.3, 154.8, 132.9, 130.0, 117.0, 99.6, 72.8, 72.0, 71.2, 68.3, 62.0, 20.7, 20.7, 20.6, 20.6, 20.6. LRMS (ESI): *m/z* calcd. for C<sub>21</sub>H<sub>30</sub>NO<sub>10</sub> [M+NH<sub>4</sub>]<sup>+</sup> 456.4; found, 456.1.

#### ***p*-Methylphenyl-β-D-glucopyranoside (9)**

Compound **9a** (124 mg, 0.28 mmol) was dissolved in a solution of sodium methoxide in methanol (5 mL) and stirred for one hour at room temperature. The solution was then neutralized with Amberlite® IR-120 (H<sup>+</sup>) ion-exchange resin, filtered and concentrated. The product was purified by recrystallization in hot ethyl acetate to afford **9** as a white powder (68 mg, 89%). Characterization data is consistent with that previously reported in the literature<sup>11</sup>. <sup>1</sup>H NMR (400 MHz, D<sub>2</sub>O): δ 7.24-7.22 (m, 2H), 7.06-7.04 (m, 2H), 5.08 (d, *J* = 7.6 Hz, 1H), 3.92 (dd,

$J = 12.4, 2.3$  Hz, 1H), 3.75 (dd,  $J = 12.4, 5.7$  Hz, 1H), 3.63-3.53 (m, 3H), 3.49 (dd,  $J = 10.0, 8.6$  Hz, 1H), 2.30 (s, 3H).  $^{13}\text{C}$  NMR (101 MHz,  $\text{D}_2\text{O}$ ):  $\delta$  154.4, 133.3, 130.2, 116.6, 100.5, 76.1, 75.6, 73.0, 69.5, 60.6, 19.6. LRMS (ESI):  $m/z$  calcd. for  $\text{C}_{13}\text{H}_{18}\text{NaO}_6$   $[\text{M}+\text{Na}]^+$  293.2; found, 293.1.

#### Phenyl-2,3,4,6-tetra-*O*-acetyl- $\beta$ -D-glucopyranoside (10a)

Compound **10a** was prepared in a similar manner as **6a** from 1,2,3,4,6-penta-*O*-acetyl- $\beta$ -D-glucopyranose (500 mg, 1.28 mmol), phenol (169 mg, 1.79 mmol) and boron trifluoride diethyl etherate (209  $\mu\text{L}$ , 1.66 mmol) with 4 Å MS in anhydrous  $\text{CH}_2\text{Cl}_2$  (10 mL) at 0 °C. Column chromatography (7:3 hexanes/EtOAc) afforded **10a** as a white powder (420 mg, 77%). Characterization data is consistent with that previously reported in the literature<sup>2</sup>.  $^1\text{H}$  NMR (400 MHz,  $\text{CDCl}_3$ ):  $\delta$  7.30 (dd,  $J = 8.7, 7.4$  Hz, 2H), 7.08 (dd,  $J = 7.8, 7.0$  Hz, 1H), 6.99 (dt,  $J = 7.8, 1.0$  Hz, 2H), 5.33-5.25 (m, 2H), 5.17 (t,  $J = 9.7$  Hz, 1H), 5.09 (d,  $J = 7.8$  Hz, 1H), 4.29 (dd,  $J = 12.3, 5.4$  Hz, 1H), 4.17 (dd,  $J = 12.3, 2.5$  Hz, 1H), 3.86 (ddd,  $J = 10.0, 5.3, 2.5$  Hz, 1H), 2.09 (s, 3H), 2.06 (s, 3H), 2.05 (s, 3H), 2.04 (s, 3H).  $^{13}\text{C}$  NMR (75 MHz,  $\text{CDCl}_3$ ):  $\delta$  170.6, 170.2, 169.4, 169.3, 156.8, 129.6, 123.4, 117.0, 99.1, 72.7, 72.0, 71.2, 68.3, 61.9, 20.7, 20.6, 20.6. LRMS (ESI):  $m/z$  calcd. for  $\text{C}_{20}\text{H}_{23}\text{O}_{10}$   $[\text{M}-\text{H}]^-$  423.4; found, 423.3.

#### Phenyl- $\beta$ -D-glucopyranoside (10)

Compound **10a** (400 mg, 0.94 mmol) was dissolved in a solution of sodium methoxide in methanol (5 mL) and stirred for one hour at room temperature. The solution was then neutralized with Amberlite® IR-120 ( $\text{H}^+$ ) ion-exchange resin, filtered and concentrated. The filtrate was concentrated and the product was lyophilized to yield **10** as a white powder (229 mg, 95%).  $^1\text{H}$  NMR (400 MHz,  $\text{D}_2\text{O}$ ):  $\delta$  7.41-7.37 (m, 2H), 7.16-7.13 (m, 3H), 5.13 (d,  $J = 7.5$  Hz, 1H), 3.94-3.90 (m, 1H), 3.74 (dd,  $J = 12.5, 5.7$  Hz, 1H), 3.64-3.54 (m, 3H), 3.48 (dd,  $J = 9.8, 8.9$  Hz, 1H).  $^{13}\text{C}$  NMR (101 MHz,  $\text{D}_2\text{O}$ ):  $\delta$  156.5, 129.9, 123.3, 116.5, 100.1, 76.1, 75.5, 72.9, 69.4, 60.5. LRMS (ESI):  $m/z$  calcd. for  $\text{C}_{12}\text{H}_{15}\text{O}_6$   $[\text{M}-\text{H}]^-$  255.3; found, 255.1.

#### *p*-Nitrophenyl-2,3,4,6-tetra-*O*-acetyl- $\beta$ -D-glucopyranoside (11a)

Compound **11a** was prepared in a similar manner as **6a** from 1,2,3,4,6-Penta-*O*-acetyl- $\beta$ -D-glucopyranose (420 mg, 1.08 mmol), 4-nitrophenol (210 mg, 1.51 mmol) and boron trifluoride diethyl etherate (180  $\mu\text{L}$ , 1.40 mmol) with 4 Å MS in anhydrous  $\text{CH}_2\text{Cl}_2$  (10 mL) at 0 °C. Column chromatography (8:2 hexanes/EtOAc) afforded **11a** as a white powder (347 mg, 68%). Characterization data is consistent with that previously reported in the literature<sup>2</sup>.  $^1\text{H}$  NMR (500 MHz,  $\text{CDCl}_3$ ):  $\delta$  8.23-8.20 (m, 2H), 7.09-7.06 (m, 2H), 5.16-5.11 (m, 3H), 5.09 (d,  $J = 3.7$  Hz, 1H), 4.28 (dd,  $J = 12.3, 5.2$  Hz, 1H), 4.18 (dd,  $J = 12.3, 2.3$  Hz, 1H), 3.86-3.82 (m, 1H), 2.07 (s, 3H), 2.06 (s, 3H), 2.03 (s, 3H), 2.02 (s, 3H).  $^{13}\text{C}$  NMR (101 MHz,  $\text{CDCl}_3$ ):  $\delta$  170.7, 170.2, 169.7, 169.3, 160.8, 140.9, 124.7, 115.5, 98.1, 74.7, 73.9, 71.2, 68.1, 61.9, 20.9, 20.7, 20.6, 20.5. LRMS (ESI):  $m/z$  calcd. for  $\text{C}_{20}\text{H}_{22}\text{NO}_{12}$   $[\text{M}-\text{H}]^-$  468.4; found, 468.2.

### ***p*-Nitrophenyl- $\beta$ -D-glucopyranoside (11)**

Compound **11a** (250 mg, 0.53 mmol) was dissolved in a solution of sodium methoxide in methanol (4 mL) and stirred for one hour at room temperature. The solution was then neutralized with Amberlite® IR-120 (H<sup>+</sup>) ion-exchange resin, filtered and concentrated. The product was purified by column chromatography (4:1:1:1 EtOAc/ACN/H<sub>2</sub>O/MeOH) to afford **11** as a white powder (128 mg, 80%). <sup>1</sup>H NMR (400 MHz, D<sub>2</sub>O):  $\delta$  8.28-8.24 (m, 2H), 7.26-7.22 (m, 2H), 5.27 (d, *J* = 7.7 Hz, 1H), 3.93 (dd, *J* = 12.3, 2.1 Hz, 1H), 3.75 (dd, *J* = 12.3, 5.7 Hz, 1H), 3.71-3.67 (m, 1H), 3.63-3.61 (m, 2H), 3.51 (t, *J* = 9.4 Hz, 1H). <sup>13</sup>C NMR (101 MHz, D<sub>2</sub>O):  $\delta$  161.7, 142.6, 126.1, 116.4, 99.4, 76.3, 75.4, 72.7, 69.3, 60.4. LRMS (ESI): *m/z* calcd. for C<sub>12</sub>H<sub>14</sub>NO<sub>8</sub> [M-H]<sup>-</sup> 300.3; found, 300.5. LRMS (ESI): *m/z* calcd. for C<sub>24</sub>H<sub>28</sub>N<sub>2</sub>O<sub>16</sub> [M-H]<sup>-</sup> Dimer 601.5; found, 601.0.

### ***p*-Fluorophenyl-2,3,4,6-tetra-*O*-acetyl- $\beta$ -D-glucopyranoside (12a)**

Compound **12a** was prepared in a similar manner as **6a** from 1,2,3,4,6-penta-*O*-acetyl- $\beta$ -D-glucopyranose (500 mg, 1.28 mmol), 4-fluorophenol (200 mg, 1.58 mmol) and boron trifluoride diethyl etherate (803  $\mu$ L, 6.4 mmol) with 4 Å MS in anhydrous CH<sub>2</sub>Cl<sub>2</sub> (6 mL) at 0 °C. Column chromatography (3:2 hexanes/ethyl acetate) afforded **12a** as a white powder (416 mg, 77%). Characterization data is consistent with that previously reported<sup>12</sup>. <sup>1</sup>H NMR (400 MHz, CDCl<sub>3</sub>):  $\delta$  7.10-7.08 (m, 2H), 6.91-6.88 (m, 2H), 5.30-5.25 (m, 2H), 5.16 (t, *J* = 9.7 Hz, 1H), 5.03-5.01 (m, 1H), 4.29 (dd, *J* = 12.2, 5.2 Hz, 1H), 4.17 (dd, *J* = 12.2, 2.5 Hz, 1H), 3.83 (ddd, *J* = 10.0, 5.3, 2.5 Hz, 1H), 2.08 (s, 3H), 2.06 (s, 3H), 2.04 (s, 3H), 2.03 (s, 3H). <sup>13</sup>C NMR (101 MHz, CDCl<sub>3</sub>):  $\delta$  170.5, 170.2, 169.4, 169.2, 160.0, 157.6, 152.9, 152.9, 118.8, 118.7, 116.1, 115.9, 99.8, 72.6, 72.1, 71.2, 68.2, 61.9, 20.7, 20.6, 20.6, 20.6. LRMS (ESI): *m/z* calcd for C<sub>20</sub>H<sub>27</sub>FNO<sub>10</sub> [M+NH<sub>4</sub>]<sup>+</sup> 460.5; found, 460.2.

### ***p*-Fluorophenyl- $\beta$ -D-glucopyranoside (12)**

Compound **12a** (198 mg, 0.45 mmol) was dissolved in a solution of sodium methoxide in methanol (5 mL) and stirred for one hour at room temperature. The solution was then neutralized with Amberlite® IR-120 (H<sup>+</sup>) ion-exchange resin, filtered and concentrated. The filtrate was concentrated and the product was lyophilized to yield **12** as a white powder (120 mg, 98%). <sup>1</sup>H NMR (400 MHz, D<sub>2</sub>O):  $\delta$  7.15-7.09 (m, 4H), 5.06 (d, *J* = 7.5 Hz, 1H), 3.93 (dd, *J* = 12.4, 2.3 Hz, 1H), 3.75 (dd, *J* = 12.4, 5.6 Hz, 1H), 3.63-3.53 (m, 3H), 3.52-3.47 (m, 1H). <sup>13</sup>C NMR (101 MHz, D<sub>2</sub>O):  $\delta$  152.7, 118.2, 118.2, 116.2, 116.0, 100.9, 76.1, 75.5, 72.9, 69.4, 60.5. LRMS (ESI): *m/z* calcd. for C<sub>12</sub>H<sub>13</sub>FNaO<sub>6</sub> [M+Na]<sup>+</sup> 297.2; found, 297.1.

### ***p*-Bromophenyl-2,3,4,6-tetra-*O*-acetyl- $\beta$ -D-glucopyranoside (13a)**

Compound **13a** was prepared in a similar manner as **6a** from 1,2,3,4,6-penta-*O*-acetyl- $\beta$ -D-glucopyranose (1.5 g, 3.84 mmol), 4-bromophenol (798 mg, 4.61 mmol) and boron trifluoride diethyl etherate (723  $\mu$ L, 5.76 mmol) with

4 Å MS in anhydrous CH<sub>2</sub>Cl<sub>2</sub> (15 mL) at 0 °C. Column chromatography (4:1 hexanes/ethyl acetate) afforded **13a** as a white powder (1.33 g, 69%). Characterization data is consistent with that previously reported<sup>13</sup>. <sup>1</sup>H NMR (400 MHz, CDCl<sub>3</sub>): δ 7.42-7.39 (m, 2H), 6.90-6.86 (m, 2H), 5.31-5.23 (m, 2H), 5.16 (t, *J* = 9.6 Hz, 1H), 5.03 (d, *J* = 7.6 Hz, 1H), 4.28 (dd, *J* = 12.3, 5.4 Hz, 1H), 4.16 (dd, *J* = 12.3, 2.4 Hz, 1H), 3.84 (ddd, *J* = 10.0, 5.4, 2.5 Hz, 1H), 2.08 (s, 3H), 2.06 (s, 3H), 2.05 (s, 3H), 2.03 (s, 3H). <sup>13</sup>C NMR (101 MHz, CDCl<sub>3</sub>): δ 170.5, 170.2, 169.4, 155.8, 132.5, 118.8, 115.9, 99.1, 72.6, 72.1, 71.1, 68.2, 61.9, 20.8, 20.8, 20.7, 20.6. LRMS (ESI): *m/z* calcd. for C<sub>20</sub>H<sub>27</sub>BrNO<sub>10</sub> [M+NH<sub>4</sub>]<sup>+</sup> 520.2; found, 520.0.

#### ***p*-Bromophenyl-β-D-glucopyranoside (13)**

Compound **13a** (200 mg, 0.40 mmol) was dissolved in a solution of sodium methoxide in methanol (5 mL) and stirred for one hour at room temperature. The solution was then neutralized with Amberlite® IR-120 (H<sup>+</sup>) ion-exchange resin, filtered and concentrated. The filtrate was concentrated and the product was lyophilized to yield **13** as a white powder (123 mg, 92%). <sup>1</sup>H NMR (400 MHz, D<sub>2</sub>O): δ 7.54-7.50 (m, 2H), 7.07-7.03 (m, 2H), 5.09 (d, *J* = 7.5 Hz, 1H), 3.92 (dd, *J* = 12.5, 2.3 Hz, 1H), 3.74 (dd, *J* = 12.5, 5.7 Hz, 1H), 3.64-3.53 (m, 3H), 3.49 (dd, *J* = 9.7, 8.9 Hz, 1H). <sup>13</sup>C NMR (101 MHz, D<sub>2</sub>O): δ 155.7, 132.6, 118.5, 115.0, 100.2, 76.1, 75.5, 72.9, 69.4, 60.5. LRMS (ESI): *m/z* calcd. for C<sub>12</sub>H<sub>15</sub>BrNaO<sub>6</sub> [M+Na]<sup>+</sup> 357.0; found, 357.0.

#### ***m*-Methoxyphenyl-2,3,4,6-tetra-*O*-acetyl-β-D-glucopyranoside (14a)**

Compound **14a** was prepared in a similar manner as **6a** from 1,2,3,4,6-penta-*O*-acetyl-β-D-glucopyranose (500 mg, 1.28 mmol), 3-methoxyphenol (222 mg, 1.79 mmol) and boron trifluoride diethyl etherate (803 μL, 6.4 mmol) with 4 Å MS in anhydrous CH<sub>2</sub>Cl<sub>2</sub> (10 mL) at 0 °C. Column chromatography (3:2 hexanes/EtOAc) afforded **14a** as a white powder (162 mg, 28%). <sup>1</sup>H NMR (400 MHz, CDCl<sub>3</sub>): δ 7.21-7.17 (m, 1H), 6.64-6.56 (m, 3H), 5.32-5.24 (m, 2H), 5.16 (t, *J* = 9.7 Hz, 1H), 5.08 (d, *J* = 7.7 Hz, 1H), 4.28 (dd, *J* = 12.3, 5.5 Hz, 1H), 4.17 (dd, *J* = 12.2, 2.4 Hz, 1H), 3.86 (ddd, *J* = 10.0, 5.5, 2.5 Hz, 1H), 3.78 (s, 3H), 2.08 (s, 3H), 2.06 (s, 3H), 2.05 (s, 3H), 2.03 (s, 3H). <sup>13</sup>C NMR (101 MHz, CDCl<sub>3</sub>): δ 170.6, 170.2, 169.4, 169.3, 160.8, 158.0, 130.0, 108.9, 108.6, 103.6, 99.0, 72.7, 72.0, 71.1, 68.3, 62.0, 55.4, 30.9, 20.6, 20.6, 20.6. LRMS (ESI): *m/z* calcd. for C<sub>21</sub>H<sub>30</sub>NO<sub>11</sub> [M+NH<sub>4</sub>]<sup>+</sup> 475.5; found, 472.1.

#### ***m*-Methoxyphenyl-β-D-glucopyranoside (14)**

Compound **14a** (162 mg, 0.33 mmol) was dissolved in a solution of sodium methoxide in methanol (5 mL) and stirred for one hour at room temperature. The solution was then neutralized with Amberlite® IR-120 (H<sup>+</sup>) ion-exchange resin, filtered and concentrated. The filtrate was concentrated and the product was lyophilized to yield **14** as a white powder (90 mg, 95%). <sup>1</sup>H NMR (400 MHz, D<sub>2</sub>O): δ 7.34-7.30 (m, 1H), 6.78-6.75 (m, 3H), 5.12 (d, *J* =

7.2 Hz, 1H), 3.93 (dd,  $J = 12.1, 1.2$  Hz, 1H), 3.82 (s, 3H), 3.76-3.72 (m, 1H), 3.65-3.54 (m, 3H), 3.51-3.46 (m, 1H).  $^{13}\text{C}$  NMR (101 MHz,  $\text{D}_2\text{O}$ ):  $\delta$  160.1, 157.7, 130.6, 109.0, 108.9, 102.9, 100.1, 76.2, 75.5, 72.9, 69.5, 60.6, 55.5. LRMS (ESI):  $m/z$  calcd. for  $\text{C}_{13}\text{H}_{22}\text{NO}_7$   $[\text{M}+\text{NH}_4]^+$  304.4; found, 304.1.

### Synthesis of *p*-methoxybenzyl-glucofuranoside **15**:

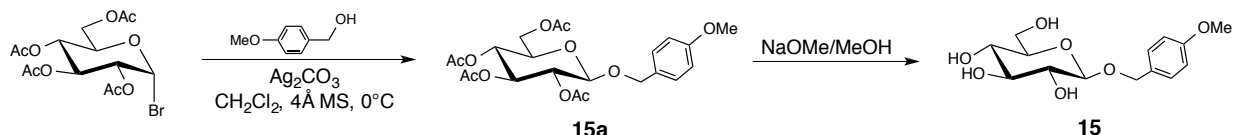

Figure S6. Synthesis of  $\beta$ -PMB-Glc (**15**).

### *p*-Methoxybenzyl-2,3,4,6-tetra-*O*-acetyl- $\beta$ -D-glucopyranoside (**15a**)

To a mixture of 4-methoxybenzyl alcohol (109 mg, 0.79 mmol),  $\text{Ag}_2\text{CO}_3$  (250 mg, 0.91 mmol) and 4 Å MS in anhydrous  $\text{CH}_2\text{Cl}_2$  (3 mL) stirring in the dark under Ar was added bromo-2,3,4,6-tetra-*O*-acetyl- $\beta$ -D-glucopyranose<sup>14</sup> (250 mg, 0.61 mmol) in anhydrous  $\text{CH}_2\text{Cl}_2$  (2 mL) dropwise over 20 minutes. The reaction mixture was diluted with  $\text{CH}_2\text{Cl}_2$  and filtered through Celite®, then washed with sodium bicarbonate, water, saturated brine, then dried over  $\text{MgSO}_4$  and concentrated. Flash column chromatography over a gradient (8:2 hexanes/EtOAc to 3:2 hexanes/EtOAc) afforded **15a** as a white solid (88 mg, 31%).  $^1\text{H}$  NMR (400 MHz,  $\text{CDCl}_3$ ):  $\delta$  7.22-7.19 (m, 2H), 6.89-6.85 (m, 2H), 5.18-5.07 (m, 2H), 5.03 (dd,  $J = 9.5, 8.0$  Hz, 1H), 4.82 (d,  $J = 11.9$  Hz, 1H), 4.56 (d,  $J = 11.9$  Hz, 1H), 4.51 (d,  $J = 7.9$  Hz, 1H), 4.27 (dd,  $J = 12.3, 4.7$  Hz, 1H), 4.17 (dd,  $J = 12.3, 2.4$  Hz, 1H), 3.81 (s, 3H), 3.66 (ddd,  $J = 9.7, 4.7, 2.5$  Hz, 1H), 2.11 (s, 3H), 2.01 (s, 3H), 1.99 (s, 3H), 1.99 (s, 3H).  $^{13}\text{C}$  NMR (101 MHz,  $\text{CDCl}_3$ ):  $\delta$  170.7, 170.3, 169.4, 169.3, 159.5, 129.5, 128.5, 113.9, 98.8, 72.8, 71.8, 71.3, 70.4, 68.4, 62.0, 55.3, 20.8, 20.7, 20.6, 20.6. LRMS (ESI):  $m/z$  calcd. for  $\text{C}_{22}\text{H}_{32}\text{NO}_{11}$   $[\text{M}+\text{NH}_4]^+$  486.5; found, 486.1.

### *p*-Methoxybenzyl- $\beta$ -D-glucopyranoside (**15**)

Compound **15a** (70 mg, 0.15 mmol) was dissolved in a solution of sodium methoxide in methanol (3 mL) and stirred for one hour at room temperature. The solution was then neutralized with Amberlite® IR-120 ( $\text{H}^+$ ) ion-exchange resin, filtered and concentrated. The product was purified by recrystallization in hot ethyl acetate to afford **15** as a white powder (34 mg, 76%).  $^1\text{H}$  NMR (400 MHz,  $\text{D}_2\text{O}$ ):  $\delta$  7.44-7.41 (m, 2H), 7.05-7.01 (m, 2H), 4.88 (d,  $J = 11.3$  Hz, 1H), 4.70 (d,  $J = 11.4$  Hz, 1H), 4.50 (d,  $J = 8.0$  Hz, 1H), 3.92 (dd,  $J = 12.3, 2.0$  Hz, 1H), 3.85 (s, 3H), 3.73 (dd,  $J = 12.3, 5.7$  Hz, 1H), 3.47-3.38 (m, 3H), 3.28 (dd,  $J = 9.0, 8.1$  Hz, 1H).  $^{13}\text{C}$  NMR (101 MHz,

D<sub>2</sub>O):  $\delta$  158.9, 130.6, 129.1, 114.1, 100.9, 75.92, 75.82, 73.1, 71.1, 69.7, 60.8, 55.4. LRMS (ESI):  $m/z$  calcd. for C<sub>14</sub>H<sub>24</sub>NO<sub>7</sub> [M+NH<sub>4</sub>]<sup>+</sup> 318.3; found, 318.2.

### Synthesis of $\alpha$ -linked *p*-methoxyphenyl-glucoyranoside **16**:

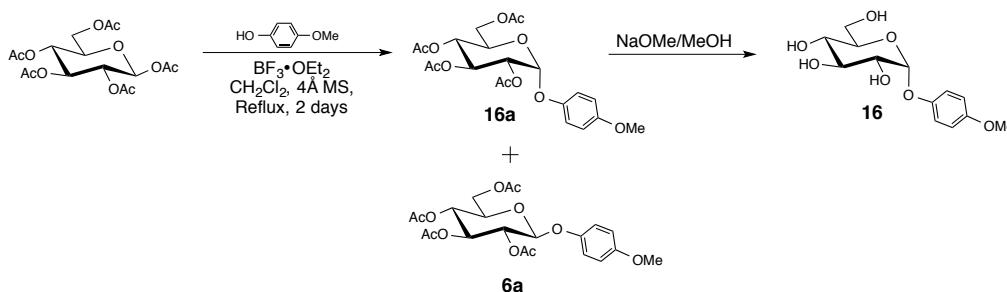

Figure S7. Synthesis of  $\alpha$ -PMP-Glc (**16**).

### *p*-Methoxyphenyl-2,3,4,6-tetra-*O*-acetyl- $\alpha$ -D-glucoyranoside (**16a**)

Compound **16a** was prepared in a similar manner as **6a** from 1,2,3,4,6-penta-*O*-acetyl- $\beta$ -D-glucoyranose (4 g, 10.3 mmol), 4-methoxyphenol (1.78 g, 14.4 mmol) and boron trifluoride diethyl etherate (2.6 mL, 20.5 mmol) with 4 Å MS in anhydrous CH<sub>2</sub>Cl<sub>2</sub> (60 mL). The reaction mixture was refluxed for 2 days, and following quenching, washing and concentration the crude mixture showed a 1:1.6 ratio of  $\alpha$ : $\beta$ -linked products (**16a**:**6a**). Column chromatography (4:1 hexanes/EtOAc) afforded **16a** as a white powder (1.43 g, 30%). Characterization data is consistent with that previously reported in the literature<sup>15</sup>. <sup>1</sup>H NMR (300 MHz, CDCl<sub>3</sub>):  $\delta$  7.02-6.97 (m, 2H), 6.84-6.79 (m, 2H), 5.68 (dd,  $J$  = 10.0, 9.7 Hz, 1H), 5.61 (d,  $J$  = 3.6 Hz, 1H), 5.13 (dd,  $J$  = 10.1, 9.4 Hz, 1H), 5.00 (dd,  $J$  = 10.3, 3.7 Hz, 1H), 4.24 (dd,  $J$  = 12.1, 4.5 Hz, 1H), 4.15 (ddd,  $J$  = 10.2, 4.5, 2.0 Hz, 1H), 4.06 (dd,  $J$  = 12.1, 2.2 Hz, 1H), 3.76 (s, 3H), 2.06 (s, 3H), 2.05 (s, 3H), 2.04 (s, 3H), 2.03 (s, 3H). <sup>13</sup>C NMR (101 MHz, CDCl<sub>3</sub>):  $\delta$  170.6, 170.3, 169.4, 169.3, 158.7, 151.5, 118.7, 115.3, 96.2, 72.2, 71.4, 71.2, 68.3, 61.9, 55.8, 20.7, 20.7, 20.6, 20.6. LRMS (ESI):  $m/z$  calcd. for C<sub>21</sub>H<sub>30</sub>NO<sub>11</sub> [M+NH<sub>4</sub>]<sup>+</sup> 472.5; found, 472.3.

### *p*-Methoxyphenyl-2,3,4,6-tetra-*O*-acetyl- $\alpha$ -D-glucoyranoside (**16**)

Compound **16a** (1.43 g, 3.15 mmol) was dissolved in a solution of sodium methoxide in methanol (15 mL) and stirred for one hour at room temperature. The solution was then neutralized with Amberlite® IR-120 (H<sup>+</sup>) ion-exchange resin, filtered and concentrated. The filtrate was concentrated and the product was lyophilized to yield **16** as a white powder (780 mg, 87%). <sup>1</sup>H NMR (300 MHz, D<sub>2</sub>O):  $\delta$  7.17-7.12 (m, 2H), 7.02-6.96 (m, 2H), 5.52 (d,  $J$  = 3.7 Hz, 1H), 3.90 (t,  $J$  = 9.4 Hz, 1H), 3.84-3.76 (m, 3H), 3.81 (s, 3H), 3.70 (dd,  $J$  = 9.8, 3.8 Hz, 1H), 3.51 (t,  $J$  = 9.5 Hz, 1H). <sup>13</sup>C NMR (126 MHz, D<sub>2</sub>O):  $\delta$  154.5, 150.2, 118.8, 114.9, 98.0, 72.9, 72.3, 71.0, 69.2, 60.1, 55.6. LRMS (ESI):  $m/z$  calcd. for C<sub>13</sub>H<sub>17</sub>O<sub>7</sub> [M-H]<sup>-</sup> 285.3; found, 285.1.

## References

1. McGill, N. W. & Williams, S. J. 2,6-disubstituted benzoates as neighboring groups for enhanced diastereoselectivity in  $\beta$ -galactosylation reactions: Synthesis of  $\beta$ -1,3-linked oligogalactosides related to arabinogalactan proteins. *J. Org. Chem.* **74**, 9388-9398 (2009).
2. Smits, E., Engberts, J. B. F. N., Kellogg, R. M. & van Doren, H. A. Reliable method for the synthesis of aryl  $\beta$ -D-glucopyranosides, using boron trifluoride-diethyl ether as catalyst. *J. Chem. Soc., Perkin Trans. 1*, 2873-2877 (1996).
3. Mukhopadhyay, B., Kartha, K. P. R., Russell, D. A. & Field, R. A. Streamlined synthesis of per-O-acetylated sugars, glycosyl iodides, or thioglycosides from unprotected reducing sugars. *J. Org. Chem.* **69**, 7758-7760 (2004).
4. Saksena, R., Zhang, J. & Kováč, P. Synthesis of 2-(trimethylsilyl)ethyl  $\alpha$ -D-mannopyranosides revisited. *J. Carbohydr. Chem.* **21**, 453-470 (2002).
5. Garegg, P. J., Kvarnström, I., Niklasson, A., Niklasson, G. & Svensson, S. C. T. Partial substitution of thioglycosides by phase transfer catalyzed benzylation and benzoylation. *J. Carbohydr. Chem.* **12**, 933-953 (1993).
6. Crich, D. & Sun, S. Direct chemical synthesis of  $\beta$ -mannopyranosides and other glycosides via glycosyl triflates. *Tetrahedron* **54**, 8321-8348 (1998).
7. Crich, D. & Sun, S. Direct synthesis of  $\beta$ -mannopyranosides by the sulfoxide method. *J. Org. Chem.* **62**, 1198-1199 (1997).
8. Crich, D. & Sun, S. Formation of  $\beta$ -mannopyranosides of primary alcohols using the sulfoxide method. *J. Org. Chem.* **61**, 4506-4507 (1996).
9. Bubb, W. A. NMR spectroscopy in the study of carbohydrates: Characterizing the structural complexity. *Conc. Magn. Reson. A* **19A**, 1-19 (2003).
10. Li, Z.-J., Cai, L.-N. & Cai, M.-S. Studies on glycosides. X. An alternate method for highly stereoselective synthesis of alkyl- $\beta$ -D-glucopyranosides. *Synth. Commun.* **22**, 2121-2124 (1992).
11. Desai, R. N. & Blackwell, L. F. Tempo-mediated regiospecific oxidation of glucosides to glucuronides. *Synlett* **2003**, 1981-1984 (2003).
12. Aich, U. & Loganathan, D. Stereoselective single-step synthesis and X-ray crystallographic investigation of acetylated aryl 1,2-trans glycopyranosides and aryl 1,2-cis C2-hydroxy-glycopyranosides. *Carbohydr. Res.* **341**, 19-28 (2006).
13. Schwizer, D. *et al.* Antagonists of the myelin-associated glycoprotein: A new class of tetrasaccharide mimics. *Biorg. Med. Chem.* **14**, 4944-4957 (2006).
14. Czechura, P., Tam, R. Y., Dimitrijevic, E., Murphy, A. V. & Ben, R. N. The importance of hydration for inhibiting ice recrystallization with C-linked antifreeze glycoproteins. *J. Am. Chem. Soc.* **130**, 2928-2929 (2008).
15. Alberti, A. *et al.* Reactivity of glycosyl radical in the presence of phenols. *Tetrahedron* **52**, 10241-10248 (1996).

## Spectra

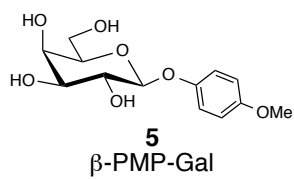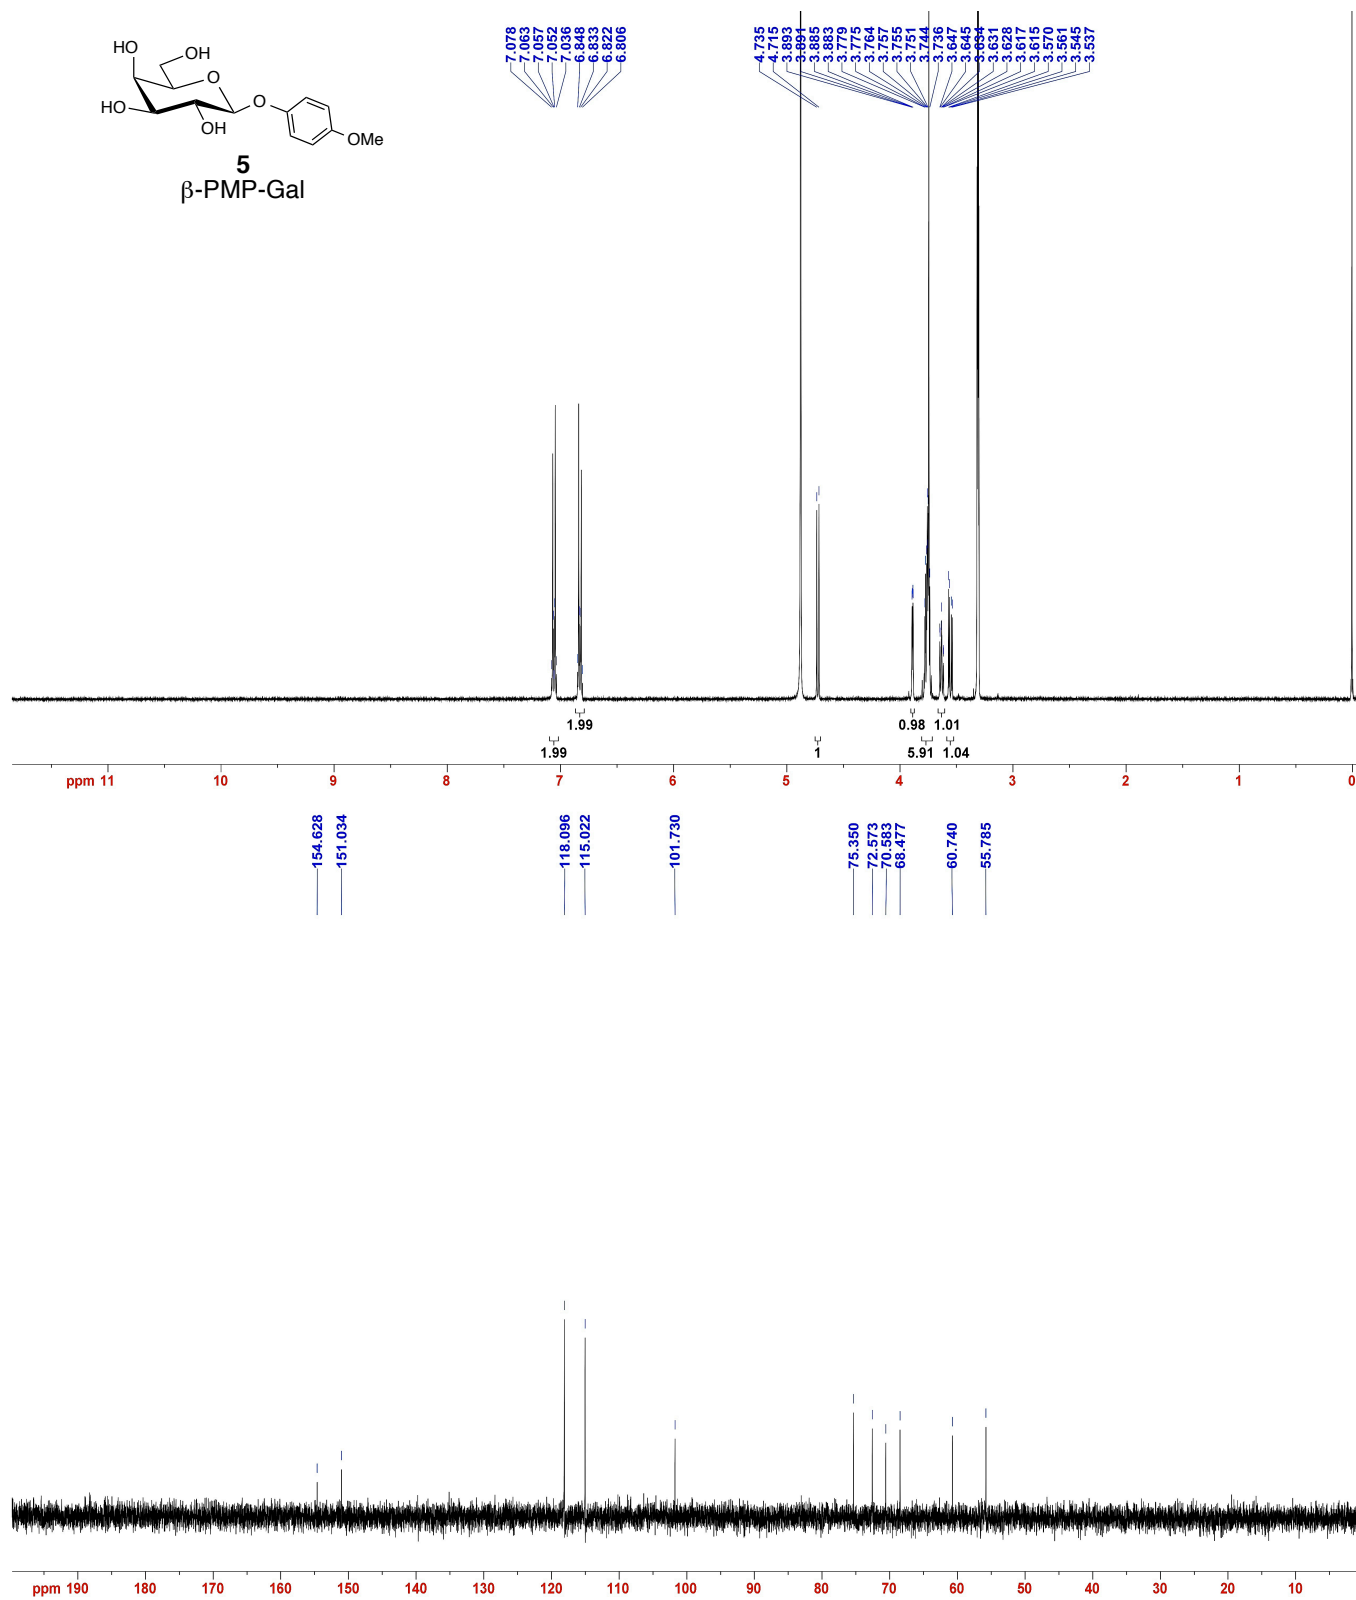

Figure S8.  $^1\text{H}$  and  $^{13}\text{C}$  spectra of  $\beta$ -PMP-Gal (**5**).



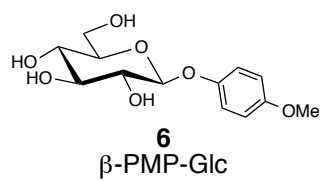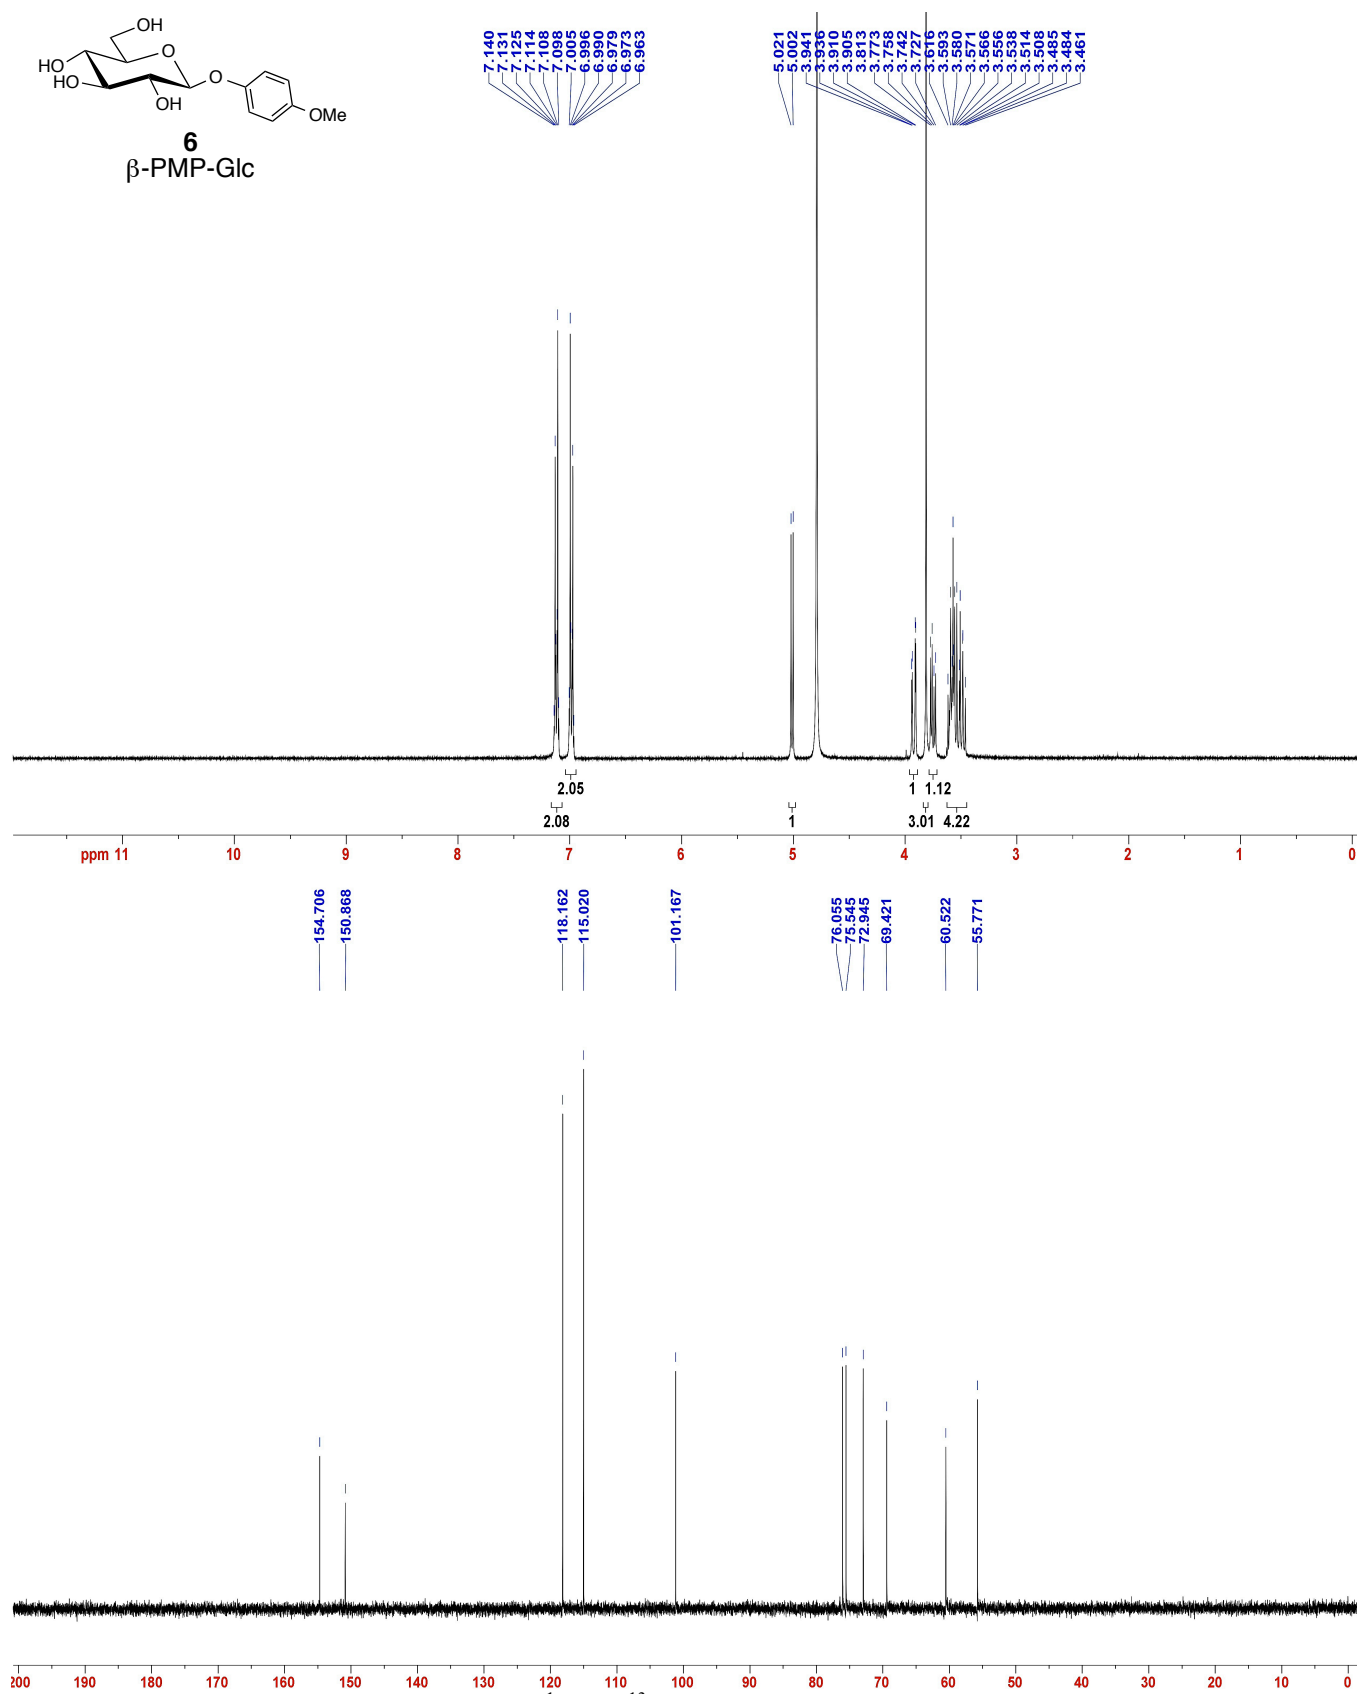

Figure S9. <sup>1</sup>H and <sup>13</sup>C spectra of β-PMP-Glc (**6**).

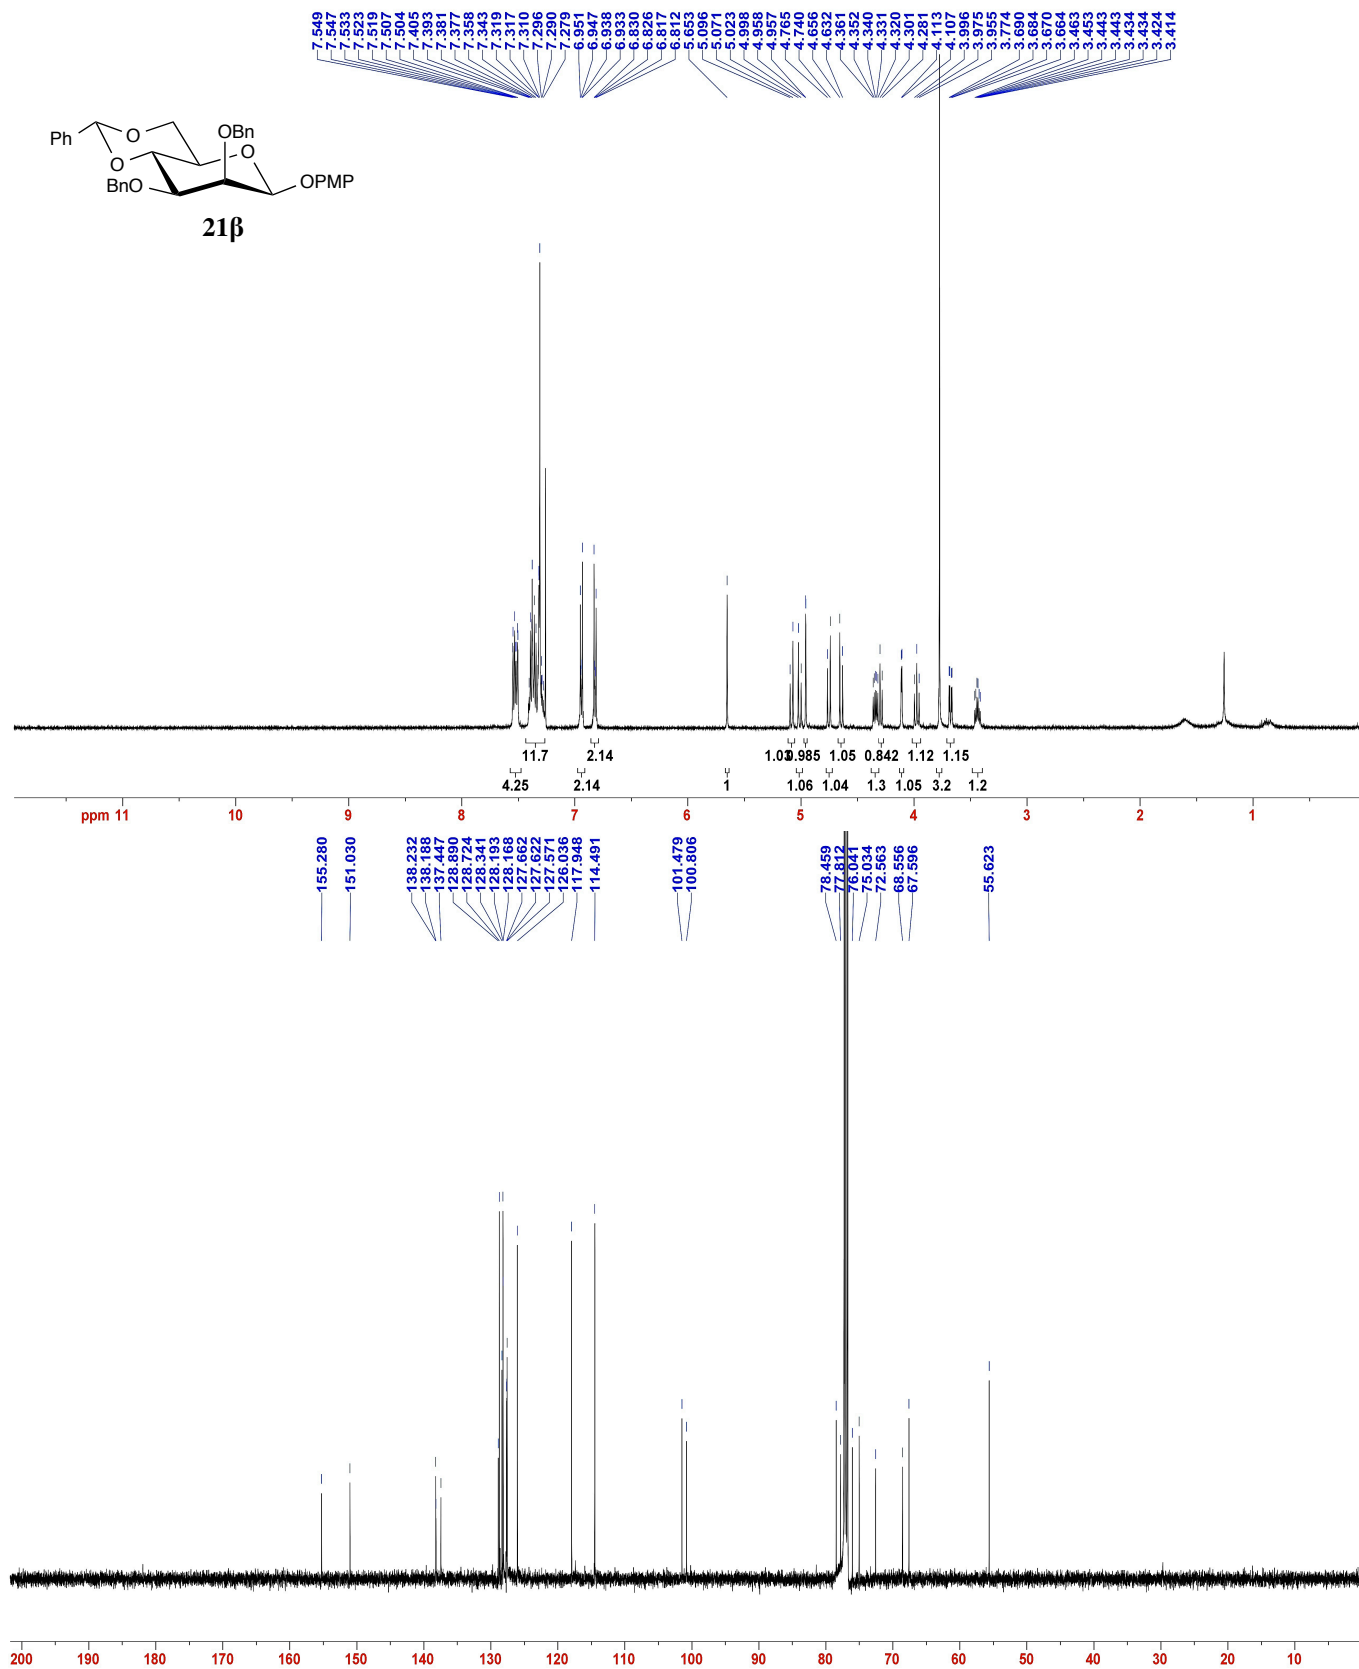

Figure S10. <sup>1</sup>H and <sup>13</sup>C spectra of 21β.

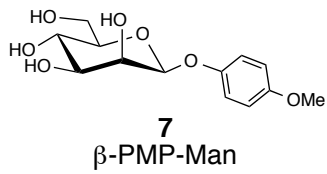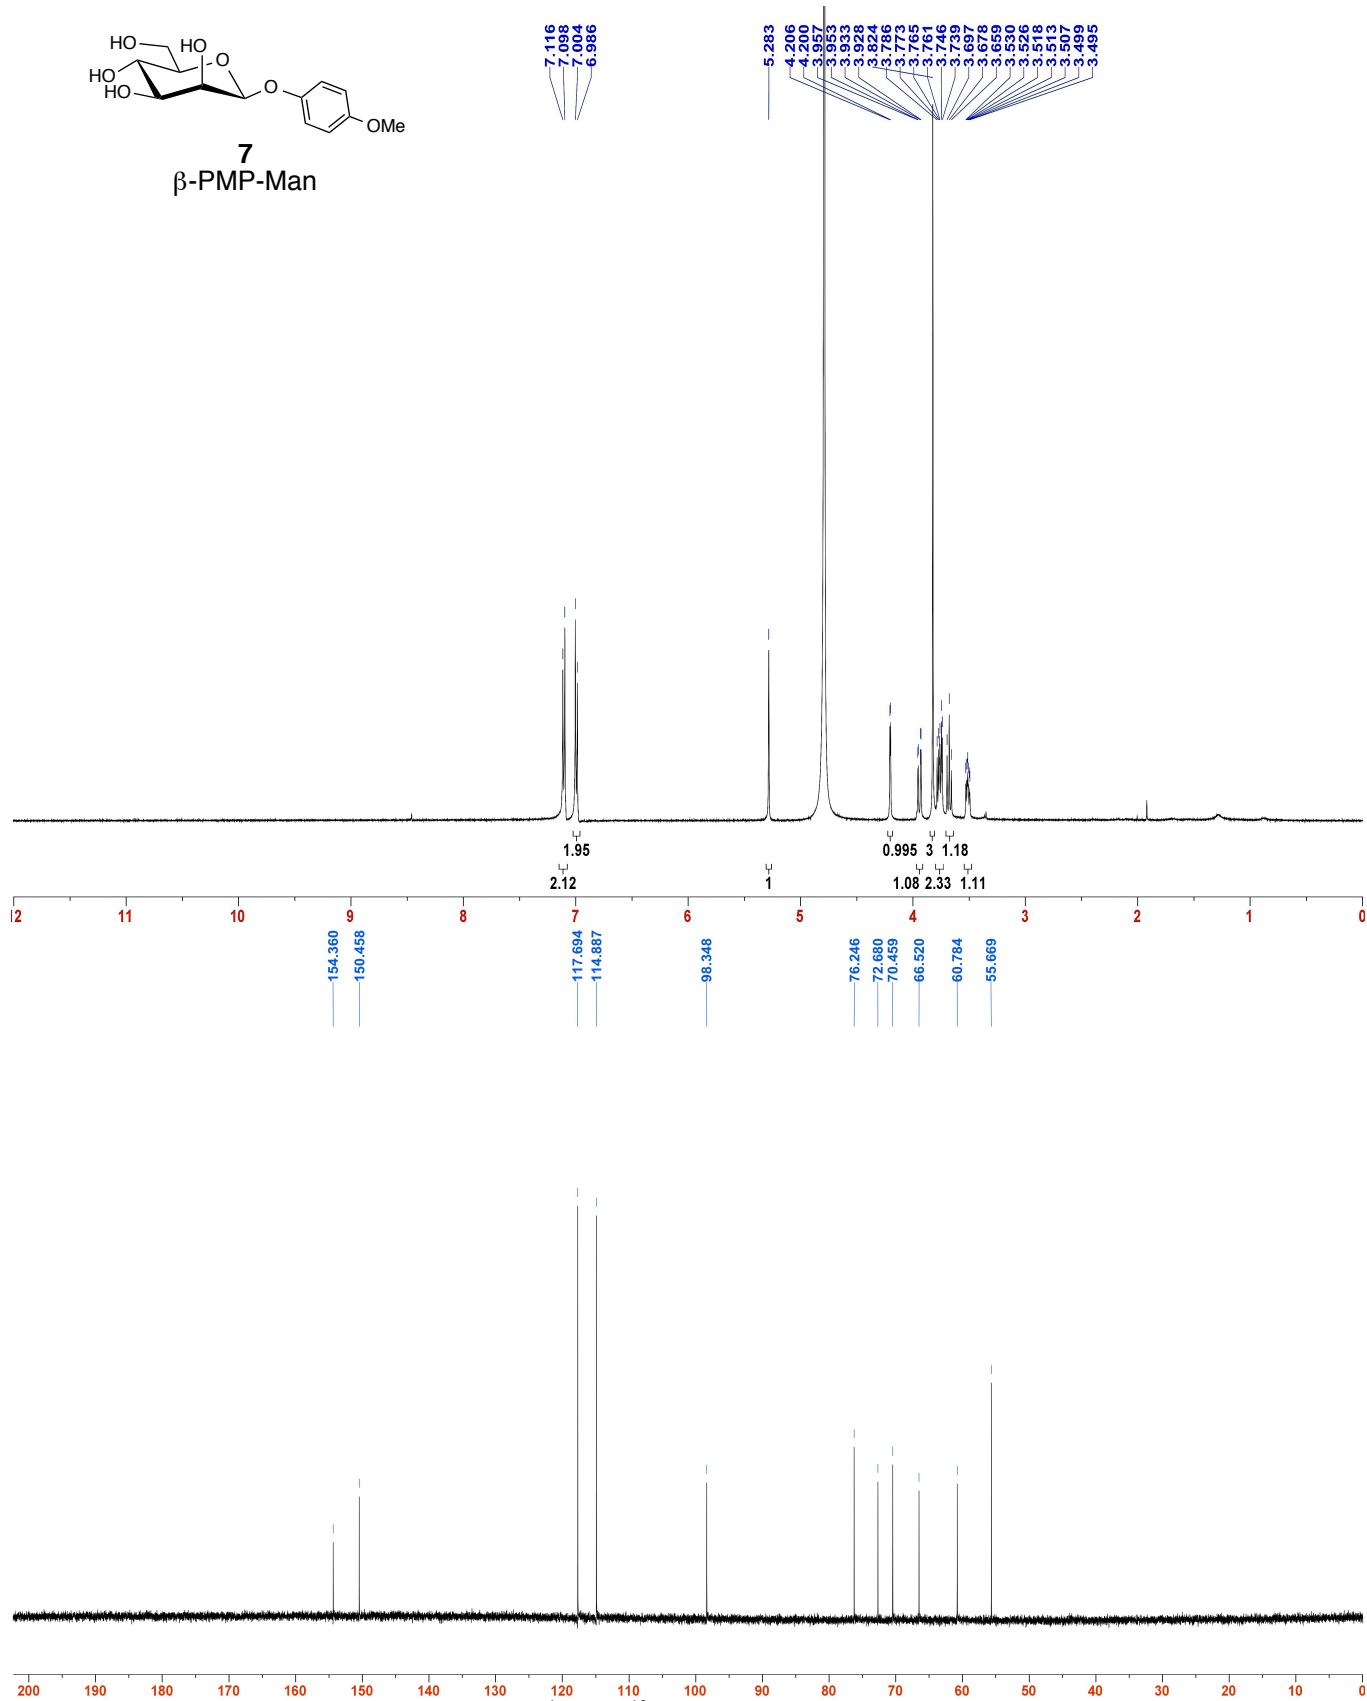

Figure S11.  $^1\text{H}$  and  $^{13}\text{C}$  spectra of  $\beta$ -PMP-Man (7).

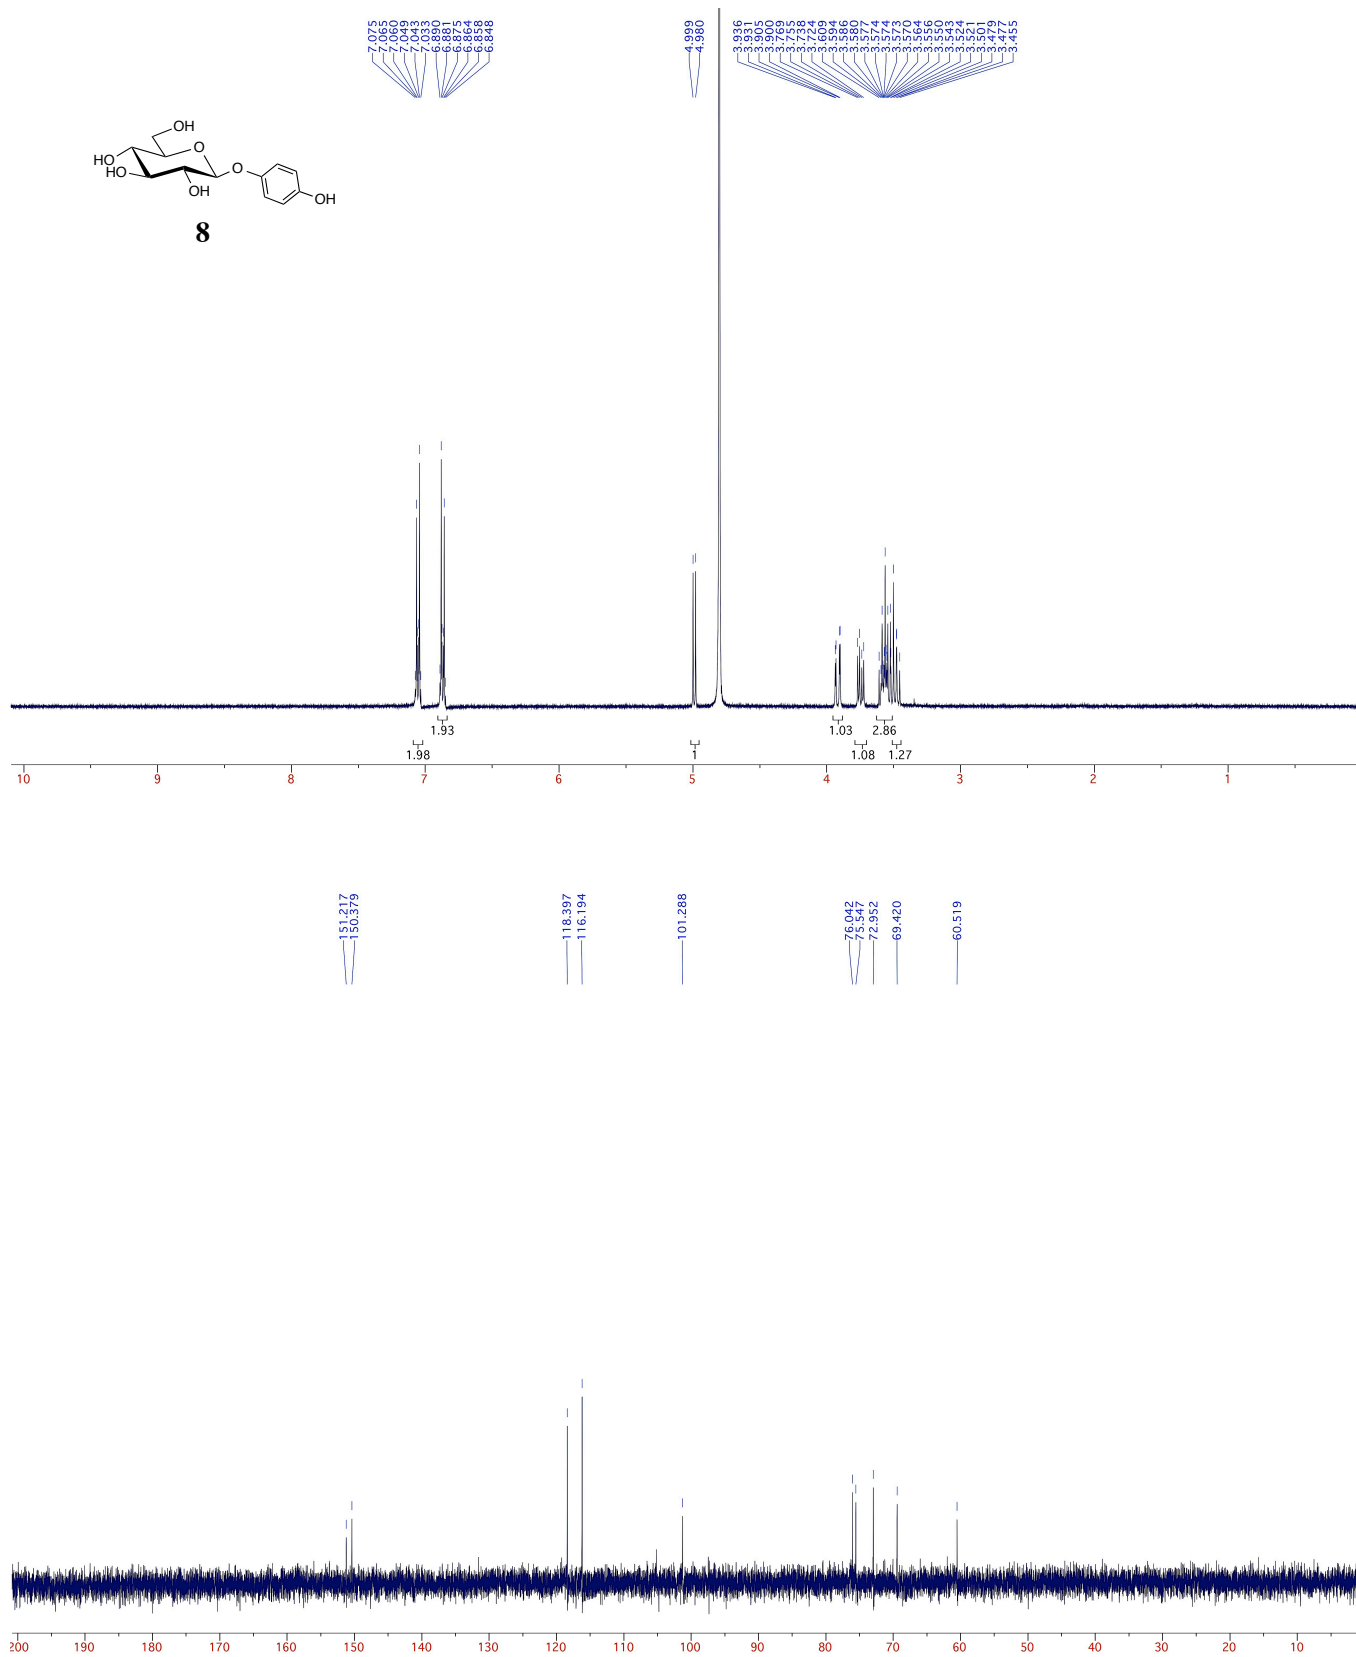

Figure S12. <sup>1</sup>H and <sup>13</sup>C spectra of β-pOHPH-Glc (8).

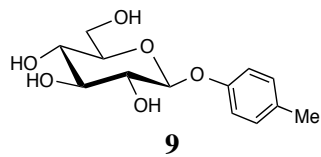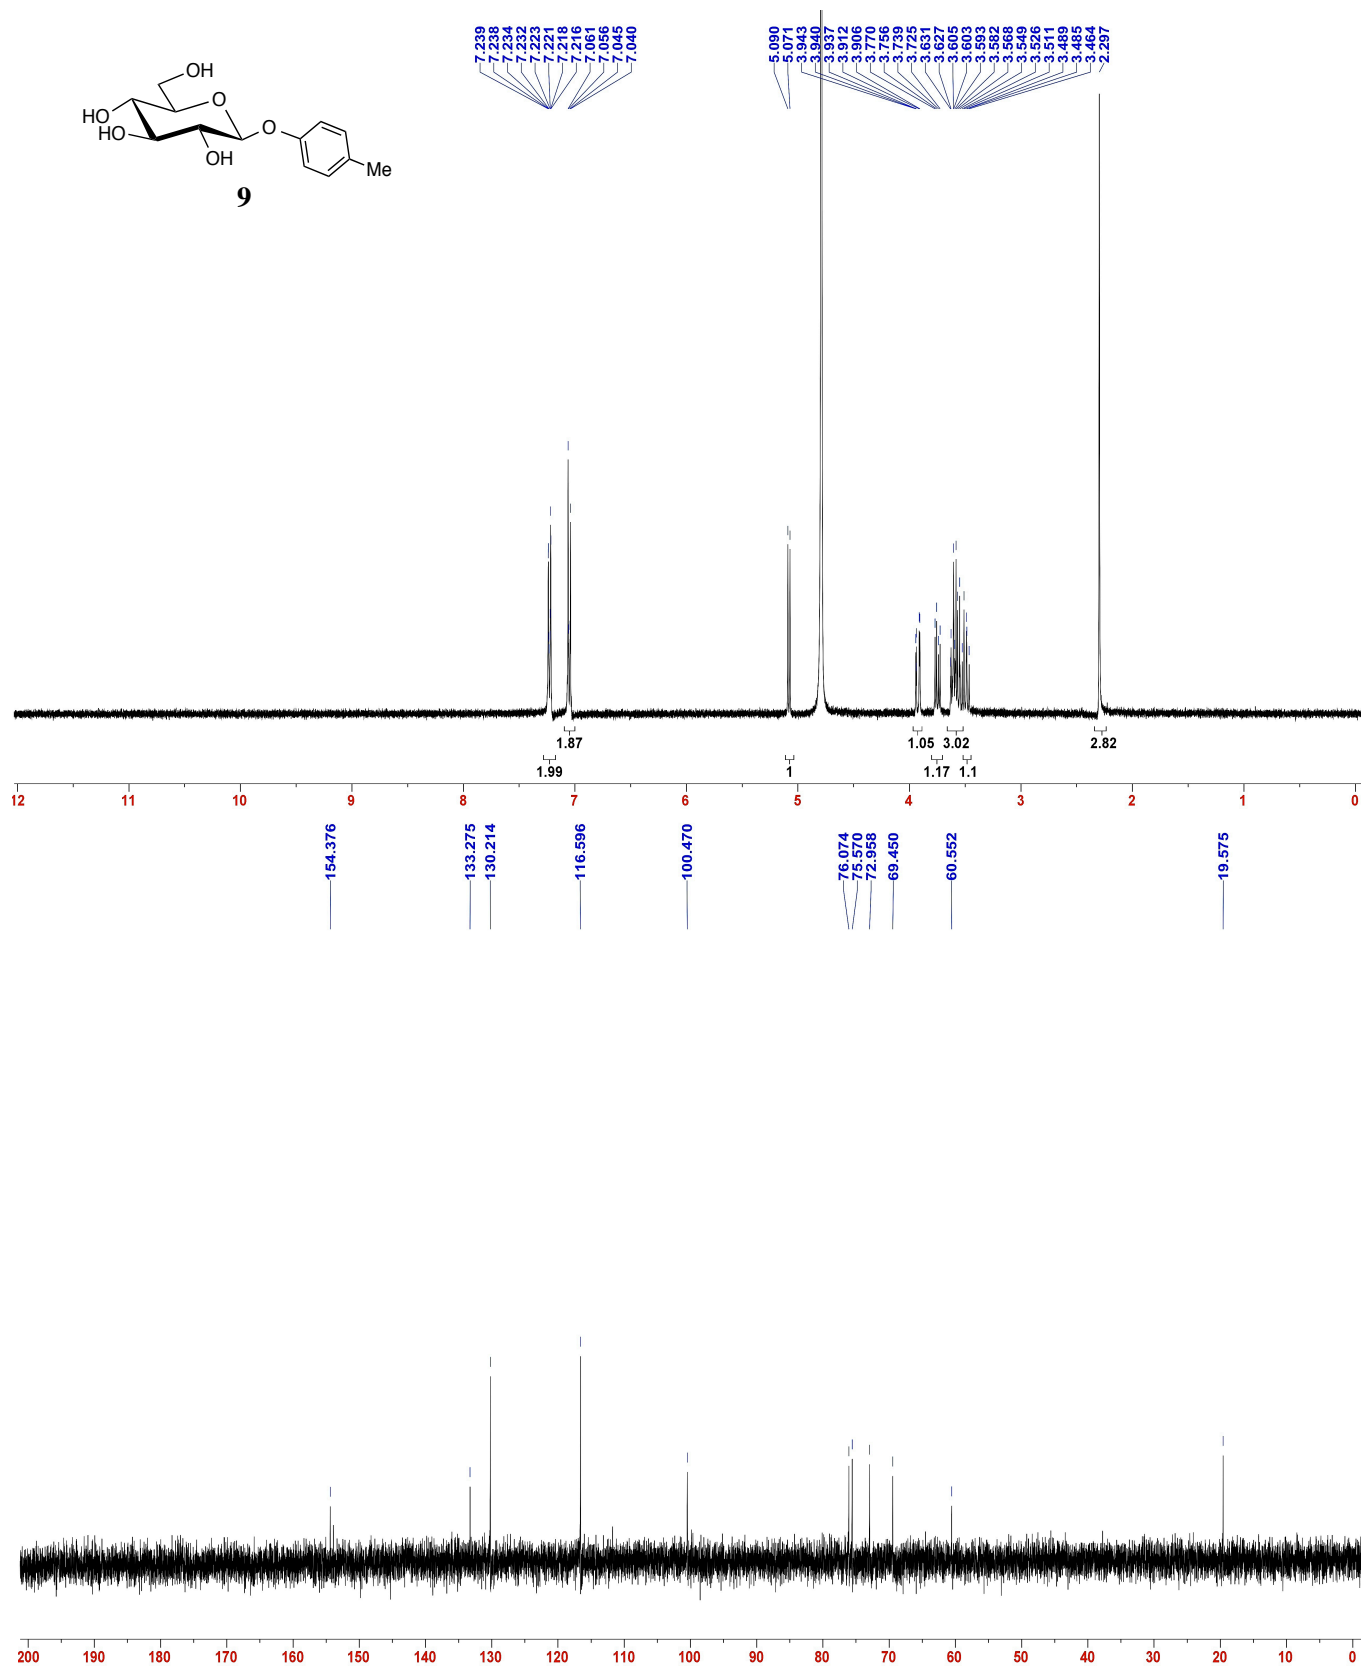

**Figure S13.** <sup>1</sup>H and <sup>13</sup>C spectra of β-pMePh-Glc (**9**).

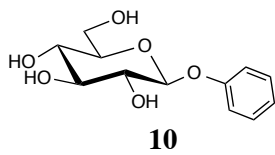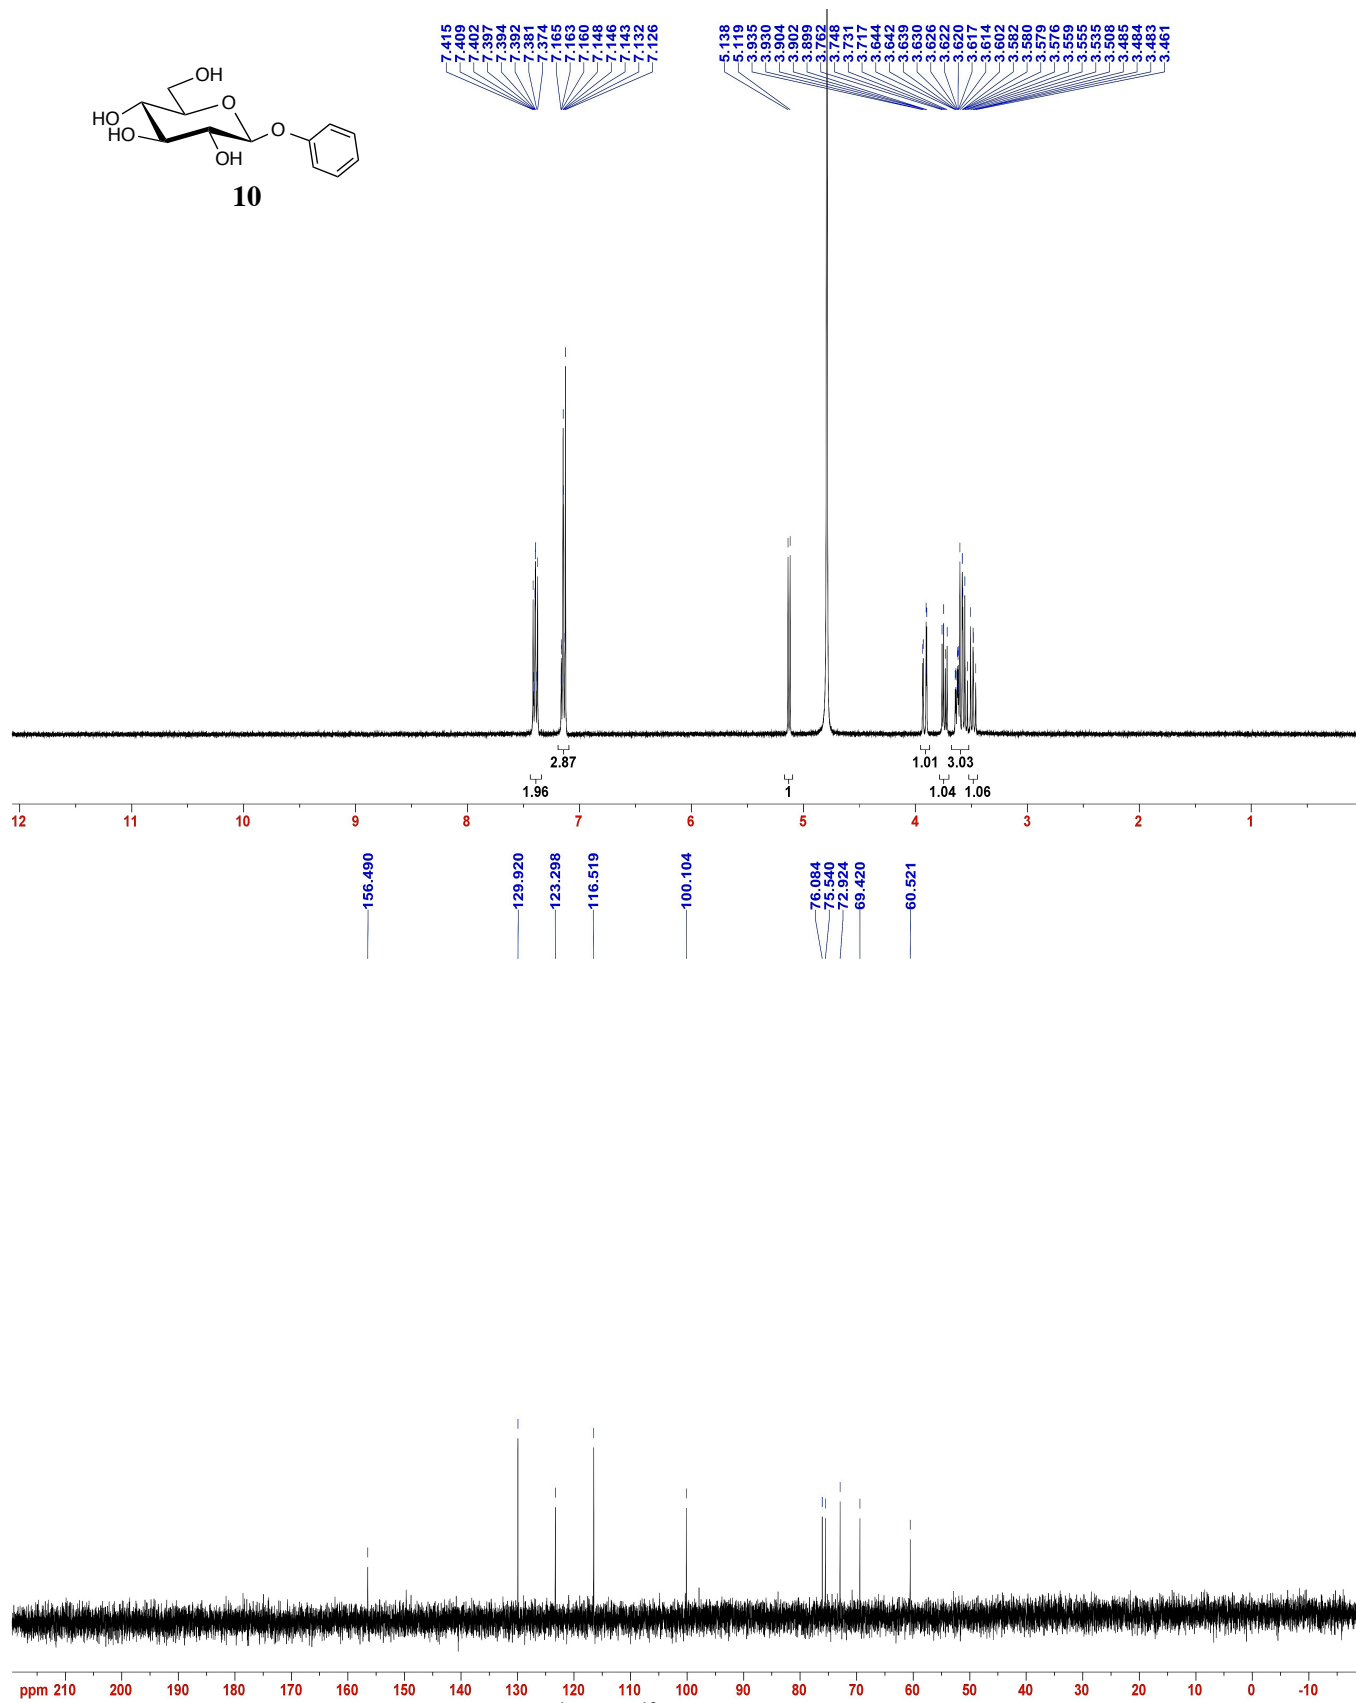

Figure S14.  $^1\text{H}$  and  $^{13}\text{C}$  spectra of  $\beta$ -Ph-Glc (**10**).

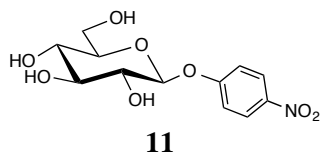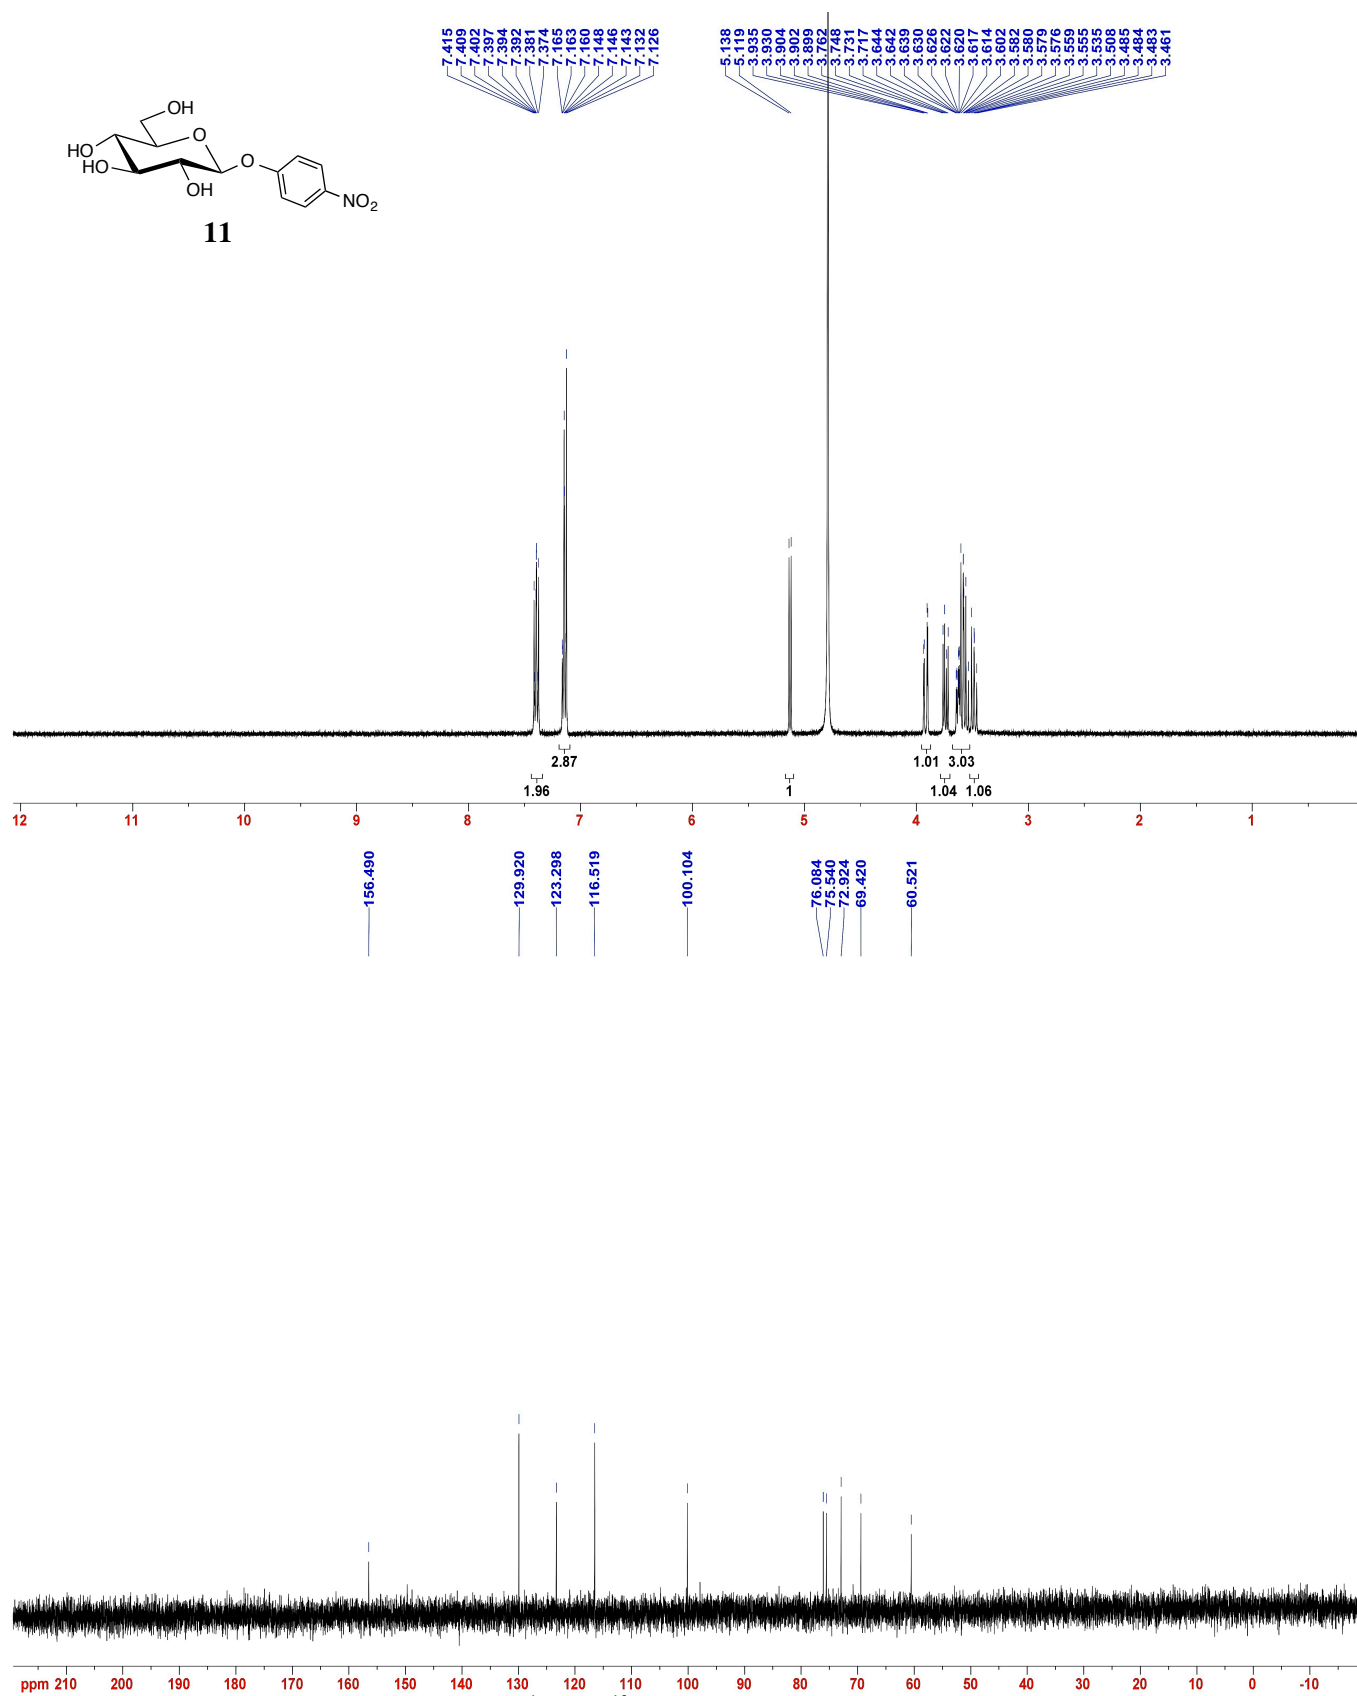

Figure S15. <sup>1</sup>H and <sup>13</sup>C spectra of β-pNO<sub>2</sub>Ph-Glc (**11**).

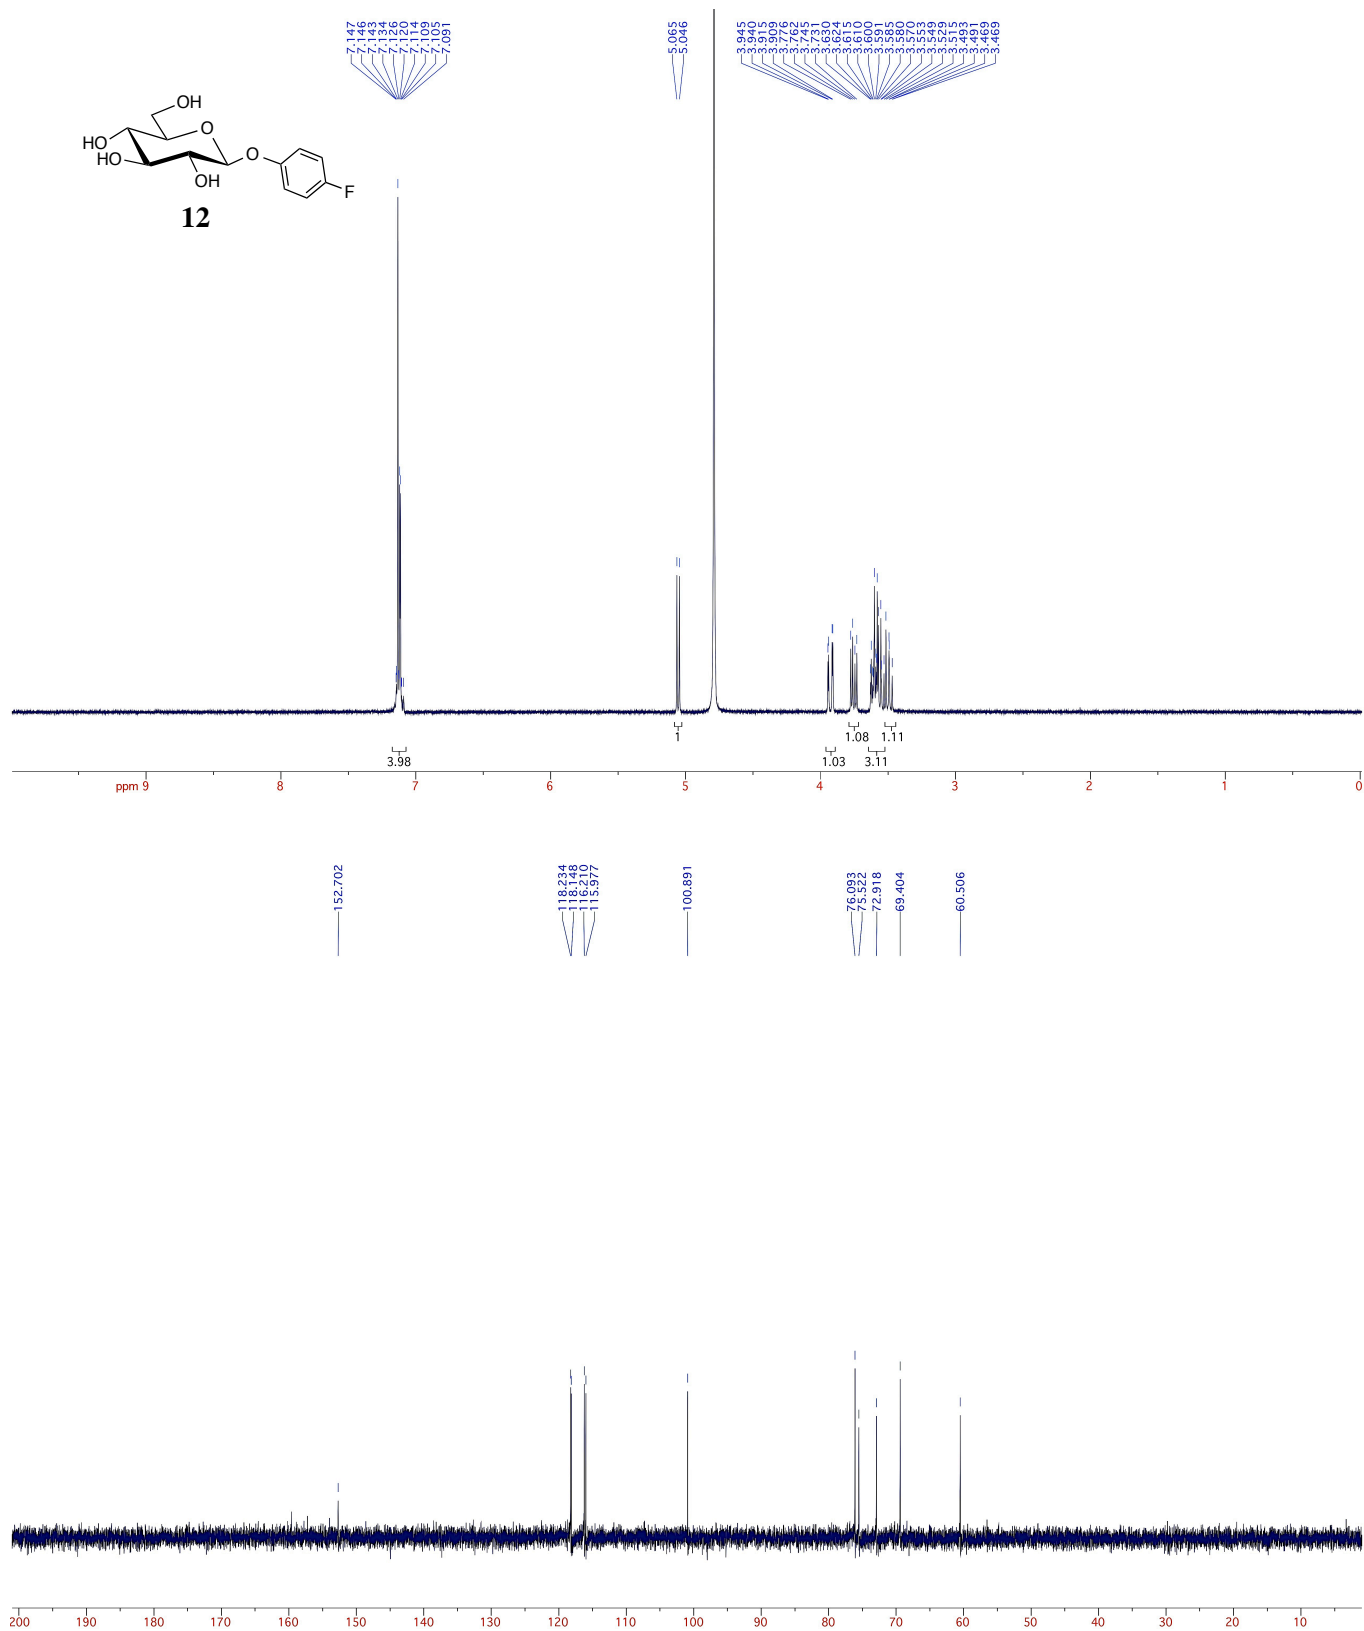

Figure S16. <sup>1</sup>H and <sup>13</sup>C spectra of β-pPPh-Glc (12).



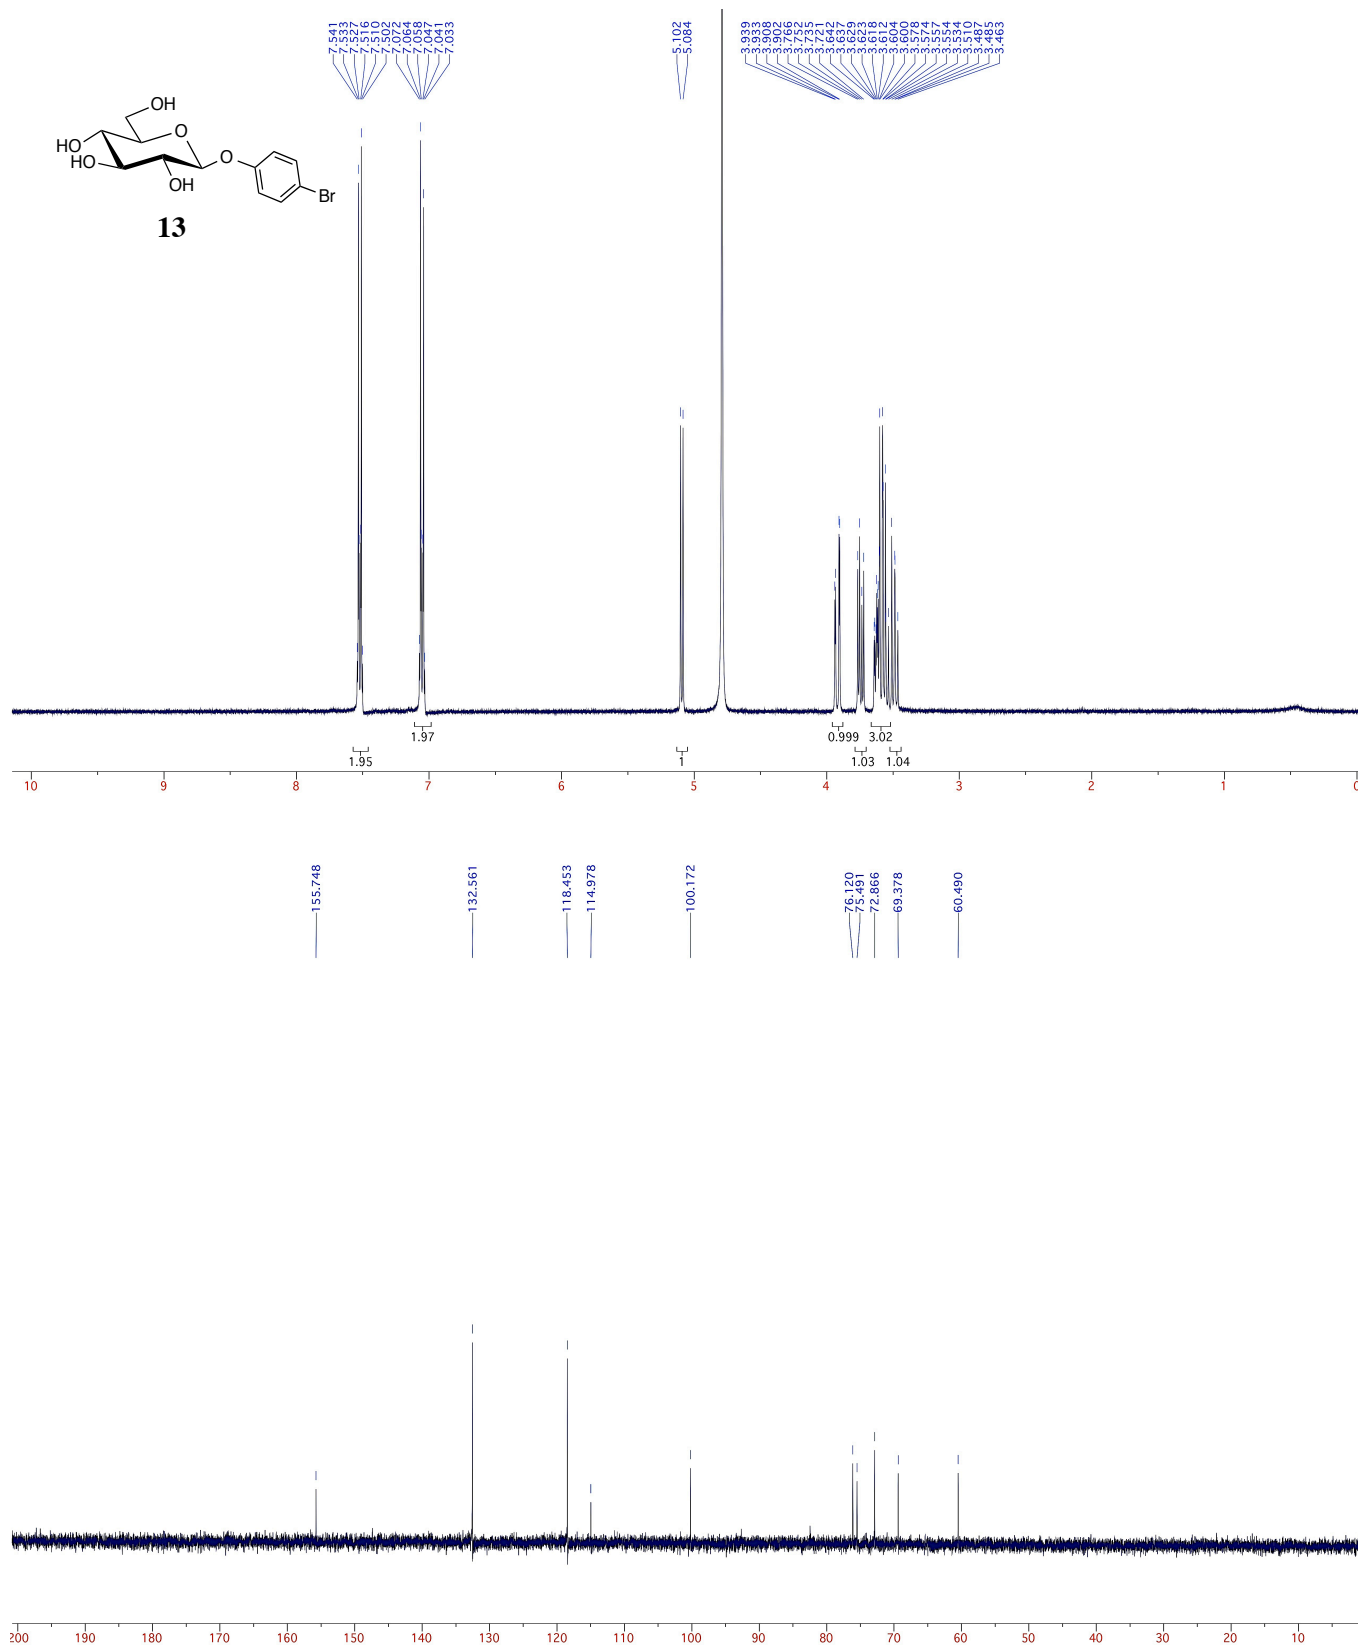

Figure S17. <sup>1</sup>H and <sup>13</sup>C spectra of β-pBrPh-Glc (13).

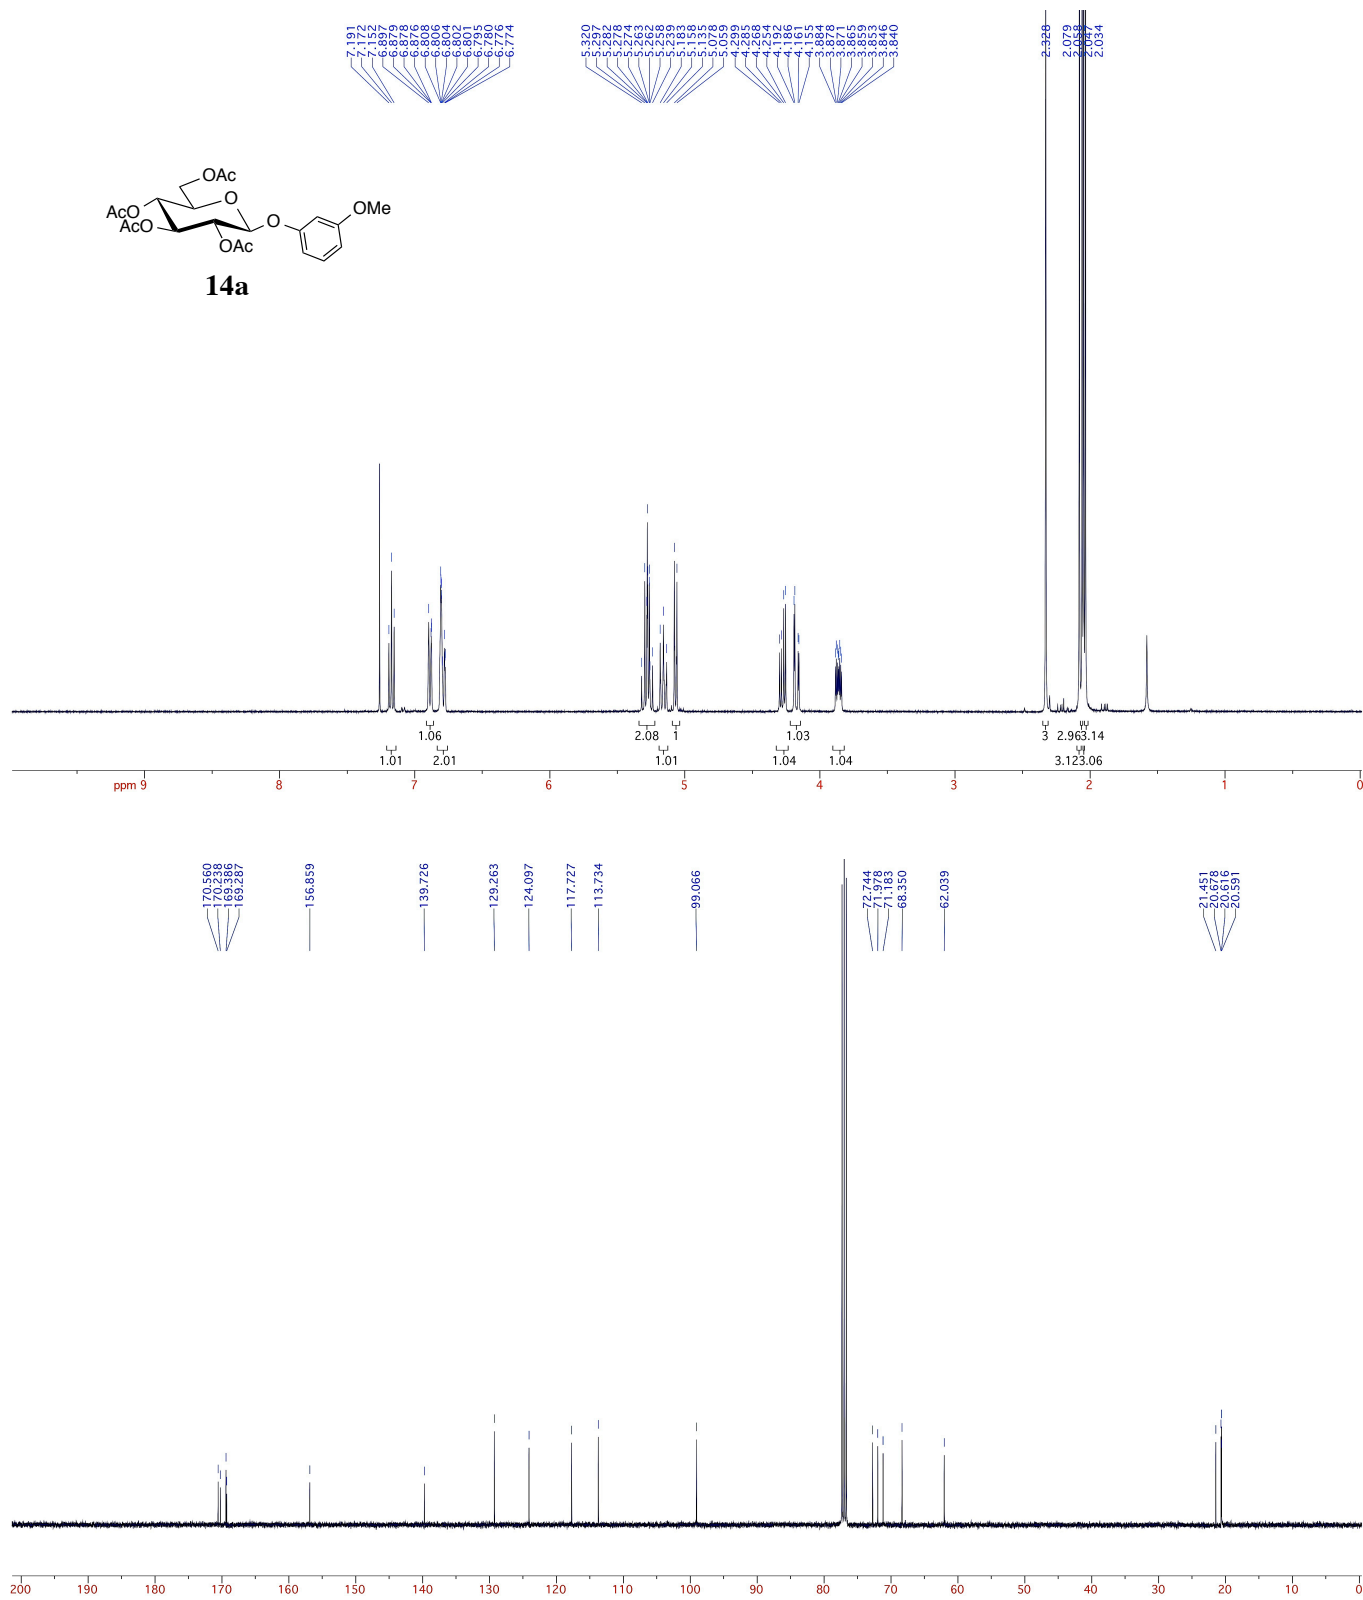

Figure S18. <sup>1</sup>H and <sup>13</sup>C spectra of **14a**.

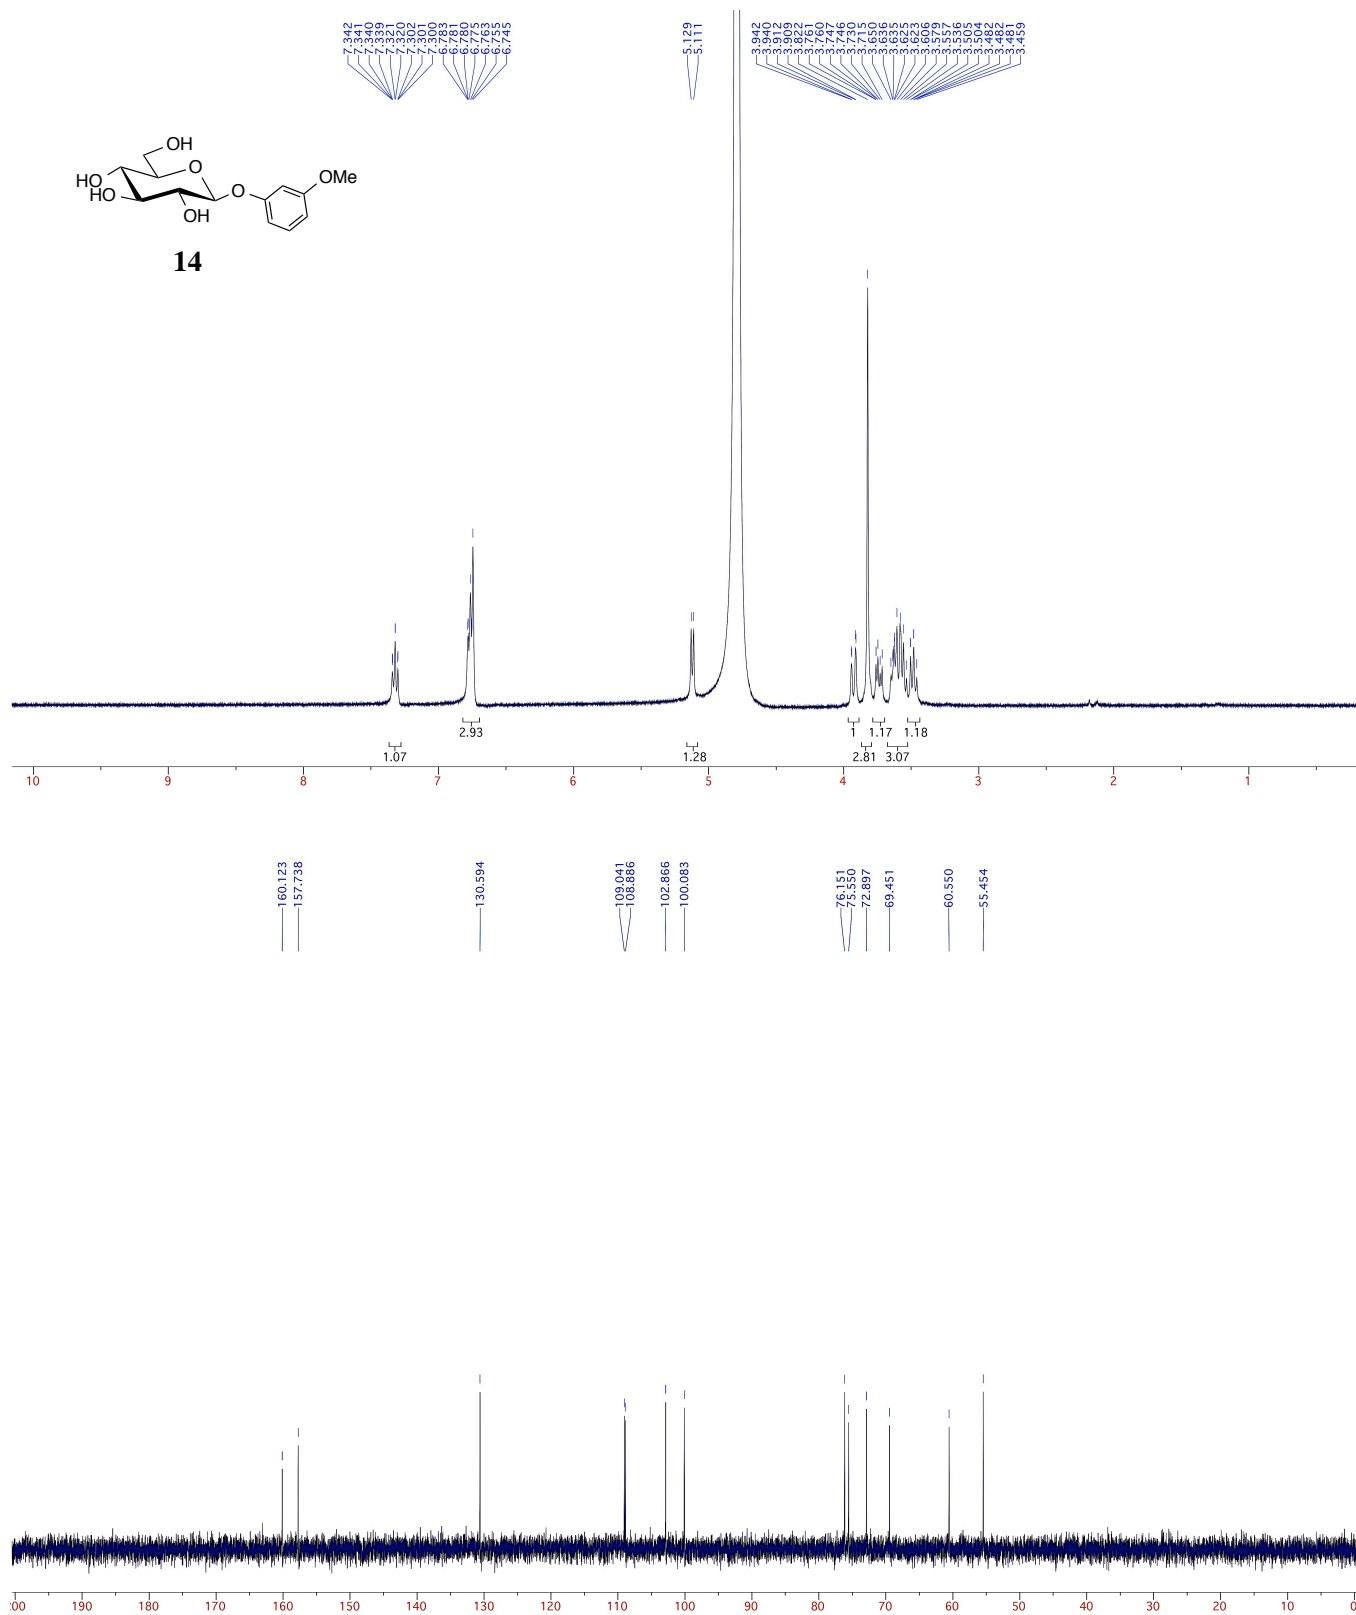

Figure S19. <sup>1</sup>H and <sup>13</sup>C spectra of β-mOMePh-Glc (14).

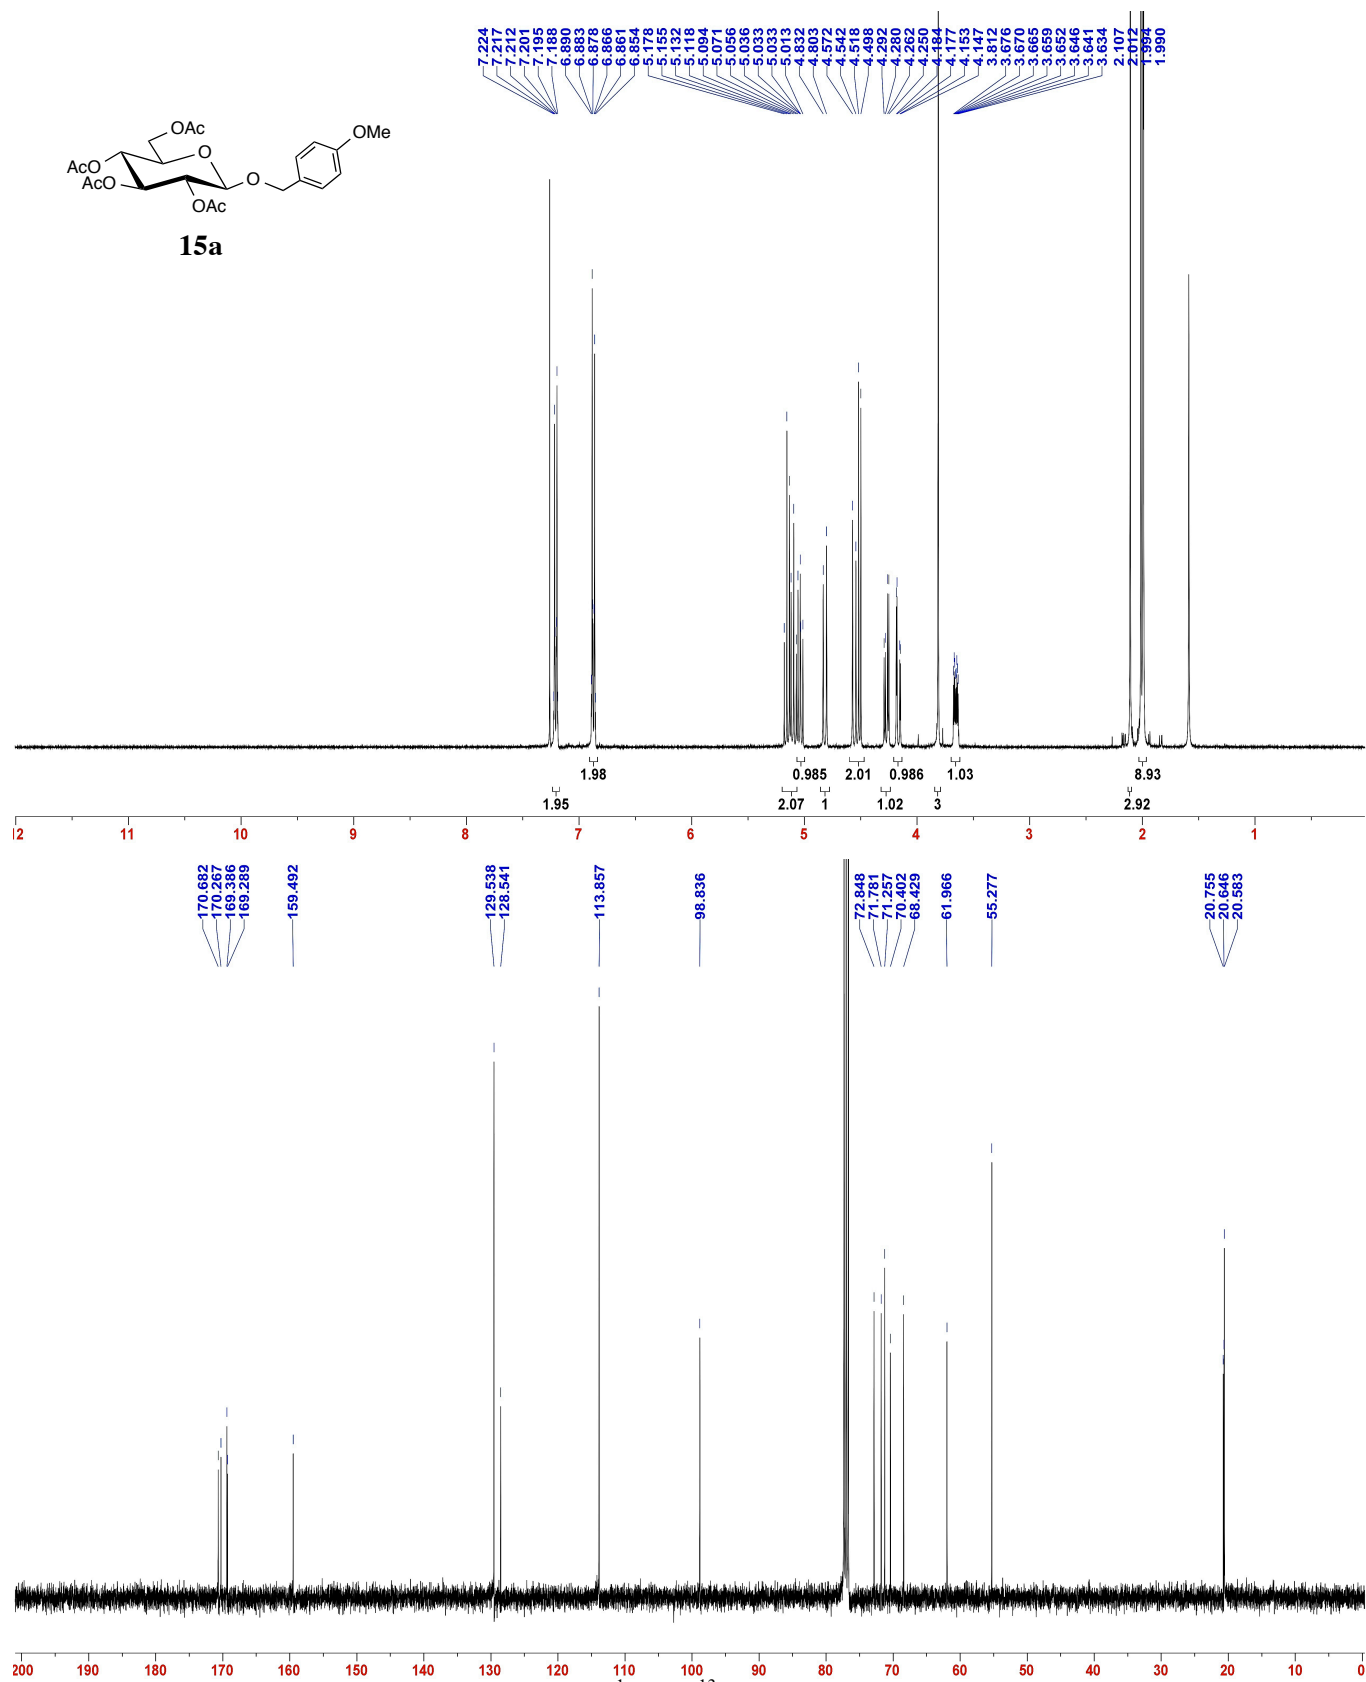

Figure S20. <sup>1</sup>H and <sup>13</sup>C spectra of 15a.

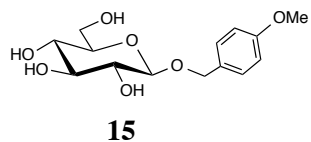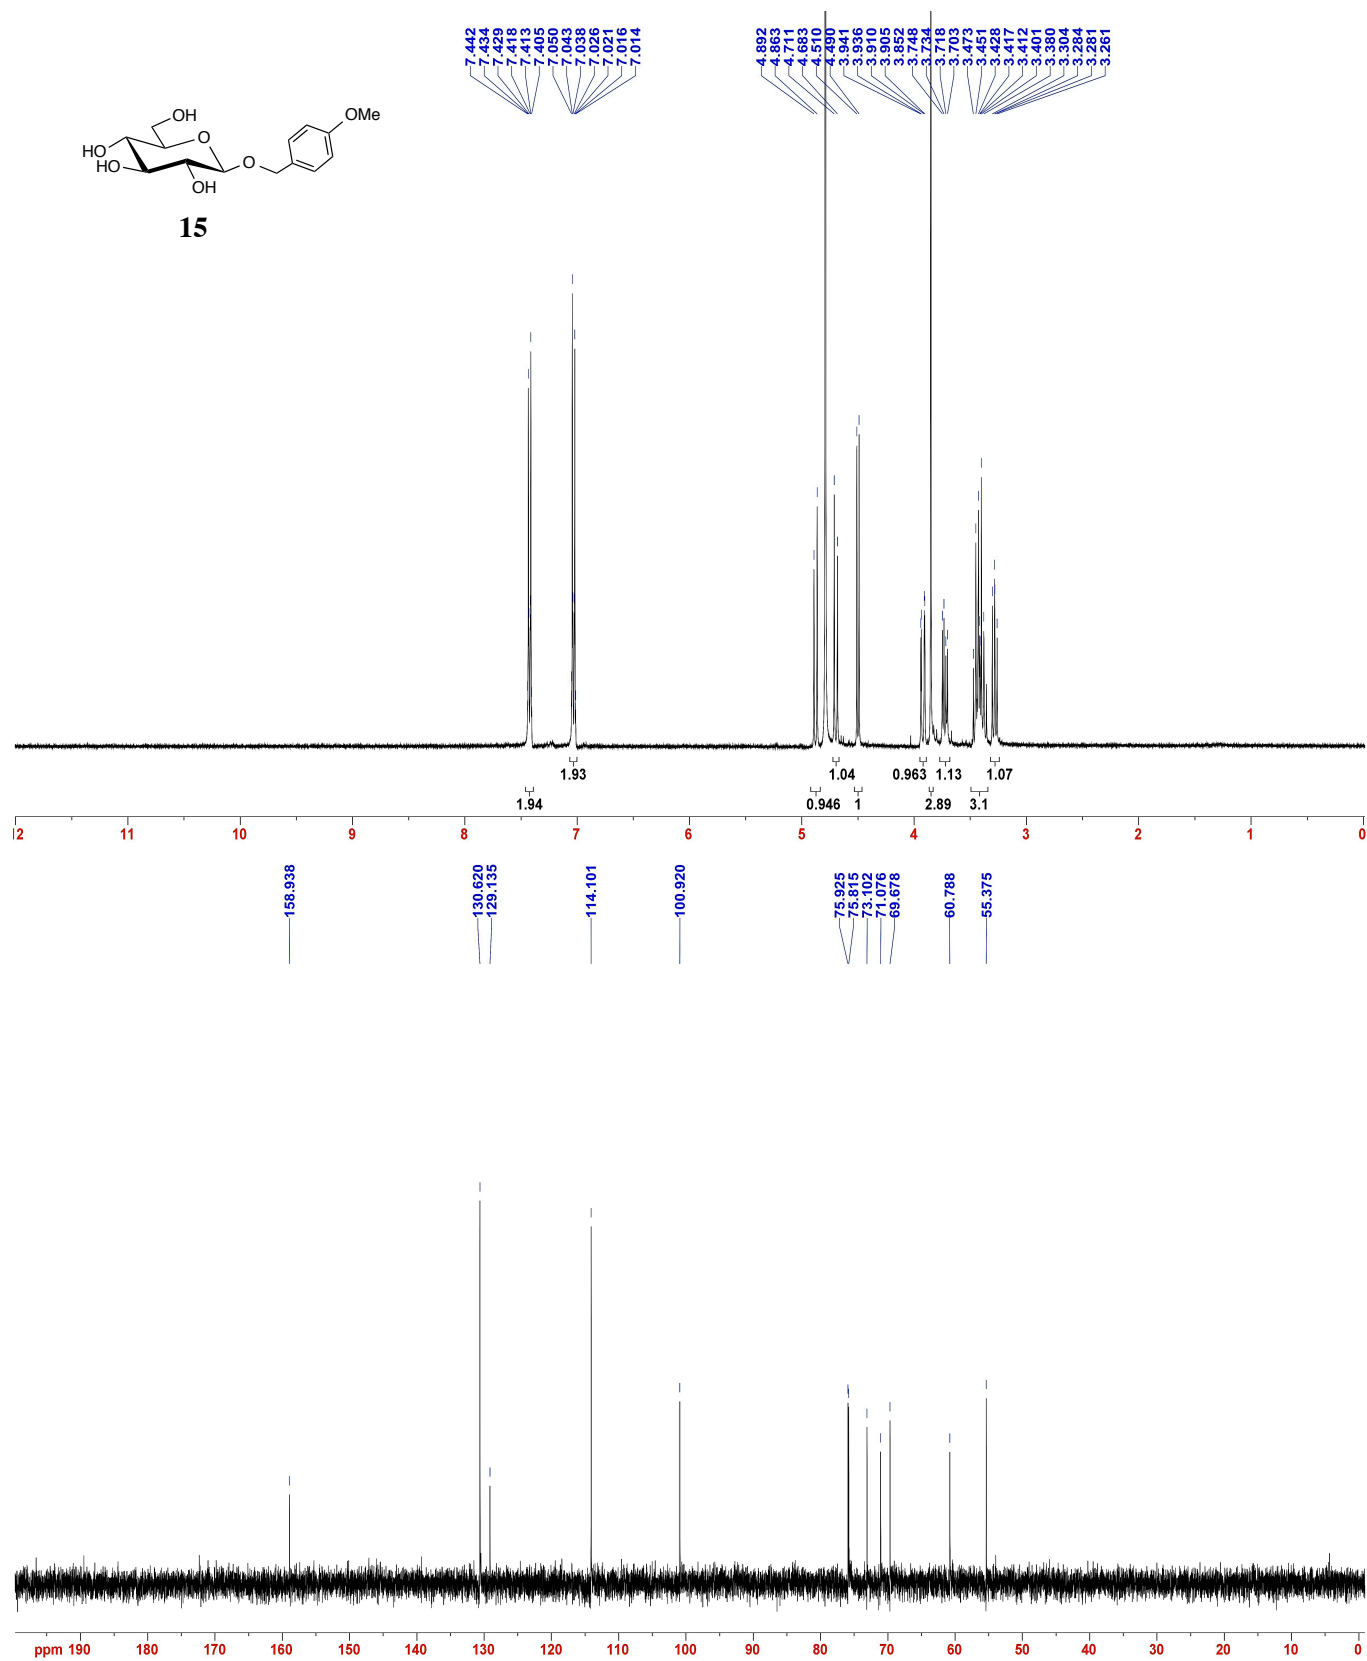

Figure S21.  $^1\text{H}$  and  $^{13}\text{C}$  spectra of  $\beta$ -PMB-Glc (**15**).

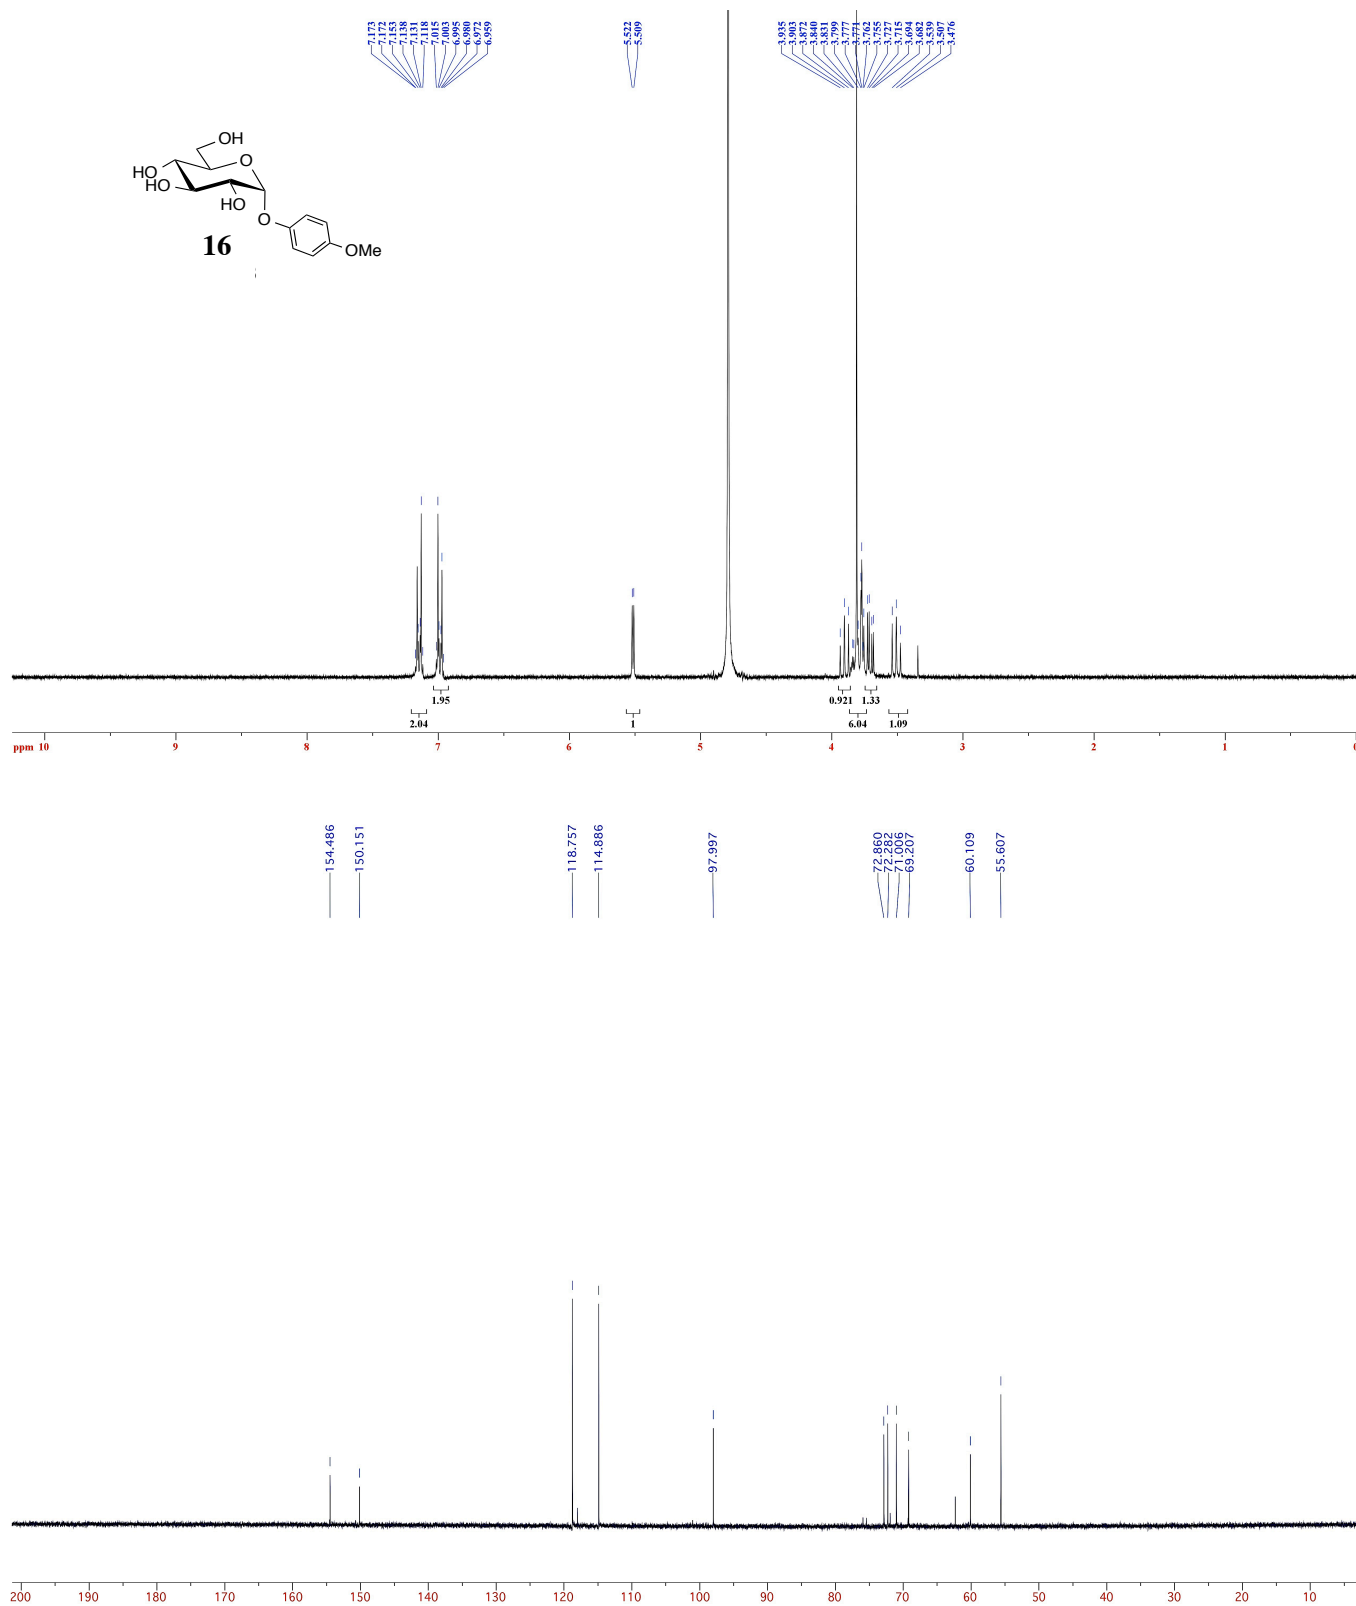

Figure S22. <sup>1</sup>H and <sup>13</sup>C spectra of  $\alpha$ -PMP-Glc (16).
